# Supplementary material for: Above-aircraft cirrus cloud and aerosol optical depth from hyperspectral irradiances measured by a total-diffuse radiometer
Source: Copernicus journal article supplement (doi:10.5194/amt-2021-269), 2021-09-28
Supplement: Supplementary file [file amt-2021-269-AC2-supplement.pdf]

We would like to thank the referee for their time and effort in reviewing this manuscript.

Review comments are in blue and the responses by the authors are in black text.

**Referee #2:**

Line 61: “Cirrus presence is especially high in equatorial regions where their frequency of occurrence can be near 50 percent.”

A reference would be good here. The cloud occurrence rate will be dependent on the spatial resolution and the sensitivity of a sensor. Does this also include sub-visual cirrus? If yes, then the occurrence rate may be higher?

References to Sassen et al. (2008), and to Zou et al. (2020; <https://doi.org/10.5194/acp-20-9939-2020>) have been added to text to support the claim about cirrus occurrence in the tropics. We agree with the referee that the presence of sub-visible cirrus can drastically alter the accounting of how often cirrus are present, and therefore different sampling methods can lead to different results. Regardless, cirrus are very common in the tropics, and that is the main point we are trying to make with this sentence. Given that cirrus climatology is not the focus of the manuscript, we have decided to not include a discussion at this level of detail.

Line 79: “This use of the ratio leaves the main sources of uncertainty as the instrument precision and assumptions made in the retrieval itself, resulting in RD being highly sensitive to small variations in optical depth.”

I think something is missing here?

This sentence has been reworded:

*By using the ratio of two radiometric quantities as the retrieval input, the measurement uncertainty affecting the retrieval output is strongly dependent on the instrument precision, which is low in relation to the overall radiometric calibration of the system. As a result, the RD method reliably detects thin clouds because it is highly sensitive to small variations in optical depth.*

Line 115, equation (2): How strong an assumption is that? What about full RT-simulations?

We do use full RT simulations when implementing the retrieval method, and these are described in Section 3. The discussion of the two-stream approximation in Section 2 is used in the manuscript to describe to the reader the physics that the retrieval methods rely upon.

Line 116: Perhaps the asymmetry parameter can be defined briefly?

We have adjusted this sentence to include a more detailed description of the asymmetry parameter:

*...where  $g$  is the asymmetry parameter of the single atmospheric layer (the mean cosine of the scattering angle, which in the context of the two-stream approximation is a parameter that describes the relative amounts of forward and backwards scattering within a layer)...*

Line 161: “In The” -> “The”

The word “In” has been deleted.

Line 117: “is a term encompassing non-Rayleigh extinction from trace gas molecular scattering”

I’m not sure what “trace gas molecular scattering” means. The Rayleigh scattering by trace gases is negligible. Do you mean absorption by trace gases?

Correct, we are referring to absorption by trace gases. The sentence now reads as follows:

*where  $\tau_{Ray,\lambda}$  is the spectral optical depth from Rayleigh scattering, and  $\tau_{mol,\lambda}$  is a term encompassing non-Rayleigh extinction from trace gas molecular and water vapor absorption sources.*

Line 192: “For the aerosol-free case within the selected wavelengths region, the  $\delta\tau_{Ray}$  profile (dashed blue line) ..”

For the dashed blue line the Rayleigh extinction was also removed, I think. Perhaps this should be mentioned explicitly.

We have changed this sentence to explicitly mention that Rayleigh extinction has been removed. The sentence now reads as follows:

*For the aerosol-free case within the selected wavelengths region, the  $\tau_{\lambda}$  profile which accounts for the  $\tau_{Ray}$  term (dashed blue line), falls nearly along a flat line of the simulated cloud optical depth value of  $\tau_{cid} = 0.20$ .*

Lines 217 – 222: What about instrumental straylight, i.e. photons that should not end up on the detector, but get somehow scattered/reflected there? Particularly the diffuse measurements must be affected by that?

The referee brings up an important point about internal reflections due to the shadow mask causing bias in the irradiance measurements. We have adjusted the manuscript to give recognition to how straylight can lead to measurement uncertainty, especially of the diffuse light. However, we do not want to focus too much attention on measurement issues that are specific to this particular version of the SPN-S instrument for a few reasons: (1) The components of the SPN-S were designed and coated with material in an attempt to minimize reflections of light at visible wavelengths. (2) The stated radiometric uncertainties of SPN-S measured irradiances attempt to account for straylight and other design induced errors. Points 1 and 2 are partially addressed in Badosa et al. (2014). (3) SPN-S is a prototype instrument, and it is still undergoing development. Since the design and calibration procedures are currently being advanced, we decided to not focus too much on issues that are related to this specific iteration of the instrument. Rather, in the manuscript, attention was paid to what are traditionally large sources of errors when making airborne irradiance measurements – errors associated with changing sensor attitude, radiometric calibration, shadow mask field-of-view being wider than the solar disk, etc.

The manuscript has been updated with the following text:

*Further, DR is minimally affected by sensor attitude errors because the  $F_{dir}$  term is in the denominator. However, there are additional sources of measurement uncertainty related to the SPN-S system that are important to consider, such as internal reflections caused by the shadow mask that can lead to bias in the measured diffuse irradiance. Internal reflections are a problem inherent to total-diffuse radiometer*

*systems reliant on shadow mask (and shadow band) designs, and a detailed discussion of how these, and related, issues have been addressed for the SPN-S are given in Badosa et al. (2014).*

Line 251: “RD outputs have less error ..”

What do you mean by "error" here? The difference between retrieved and true values or the retrieval error estimate? This should probably be stated explicitly.

We have rewritten this sentence to make it clearer.

*The results support the analysis of the analytic functions presented in Figure 2: when  $\tau_{\text{cld}} < \sim 1$  the output of the RD method has less uncertainty in the retrieved optical depth making it the superior method. When  $\tau_{\text{cld}}$  is greater than unity, there is less uncertainty associated with the retrieved optical depth from the RS method.*

Line 255: “the output of RD fall” -> “the output of RD falls” ?

This sentence has been corrected in the manuscript.

*Another limitation that is worth mentioning: the output of RD falls below the identity line because of difference in the scattering phase functions used in the simulated data and the DR calculations in the retrieval.*

Line 284: “though” -> “through”

Fixed.

Line 293: “Reid et al., (2021).”

Comma after “al.” should be removed. Please also check the other citations.

We have removed the extra commas throughout the manuscript.

Line 296: “decent” -> “descent”

Fixed.

Line 322: “DR < 0.9”

At which wavelength?

It is the diffuse ratio is at 500 nm. We have added this information to the text.

Lines 327 – 330: What about contamination of the diffuse measurements by solar photons scattered etc. by the instrument/mask etc.? There must be a contamination to a certain extent?

This comment is related to a previous one made about the text in lines 217-222, and we feel that the issue of straylight contaminating the diffuse measurement has been sufficiently addressed in responding to the

first comment. The paragraph starting at line 327 is focused on sensor FOV induced uncertainty, which of course are related to the shadow mask design of the instrument, but we feel that

Line 380: “wavelenght” -> “wavelength”

Fixed.

Line 383: “angstrom” -> “Ångström” (or even better with \AA at the beginning)

We corrected the spelling of Ångström.

Line 411: “DR\_mea < 0.95”

At which wavelength?

At 500 nm. The text has been updated.

Caption Fig. 4: “In red, a sample from 1 km which is within the aerosol layer”

The text in the Figure says "below aerosol". Please clarify.

The caption text has been updated to be consistent with Figure legend. The example is from below an aerosol layer.

Line 476: “These optical depths are mostly due to the presence of stratospheric aerosols”

Stratospheric aerosol optical depth in the visible spectral range is on the order of a few times  $10^{-3}$  for background conditions, not more, i.e. significantly lower than 0.05.

This statement was worded in a confusing manner. For the retrieval being presented by the manuscript (RS method, which is based on Beer’s Law), the AOD above the aerosol layer is 0.05. This non-zero value is mostly due to limitations of the sensitivity of the retrieval method (as is shown in Figures 2 and 3), and not from stratospheric aerosols. (However, a typical stratospheric aerosol AOD value is within the uncertainty of the retrieved AOD, which extends to zero at spiral top.) 4STAR, on the other hand, measures a non-zero AOD above the aerosol layer (typically  $<0.01$ ) that is due to stratospheric aerosols and trace aerosols in the upper portions of the troposphere less. The paragraph has been reworded for clarity as follows:

*Above the aerosol layer, RD detects a non-zero optical depth of  $\sim 0.05$ , which is mainly a result of the relatively high retrieval uncertainty of the RS method when observing small optical depths (see Figures 2 and 3). This is similar to the measurements made by 4STAR which commonly detects non-zero optical depths at the top of the spiral. However, in the case of 4STAR, these optical depths are mostly due to the presence of stratospheric aerosols (Kremser et al., 2016), though there may also be contribution from small amounts tropospheric aerosol as well.*

Caption Fig. 6: “are sorted into bins with 0.25”

I think “0.25” should be “0.025”.

This has been fixed in the manuscript.

Line 552: “However, we expect that since  $\tau_{RS,aer}$  is a layer, and not a column optical depth, the forward scattering of light by cirrus which inhibits the SDA method to be less troublesome for our RS method because the irradiance at the top of the layer is directly characterized.”

I didn't understand this sentence. Is something missing here? Please adjust or add commas to make the meaning of the statement clearer.

This paragraph has been reworked as follows:

*However, there is reason to expect the RS method will be able to retrieve  $\tau_{aer}$  under cirrus conditions to lower uncertainty than has been possible using past methods. For example, the SDA method is developed for use with ground-based measurements and therefore it derives a column optical depth. When retrieving column  $\tau_{aer}$  it is difficult to account for the forward scattering of light by cirrus which makes it difficult to accurately constrain  $\tau_{aer}$ . In the RS method, because the irradiance at the top of the layer is directly characterized, the forward scattering by cirrus is accounted for when deriving  $\tau_{aer}$ .*

Line 565: “the points generally falling below”

I think “falling” should be “fall”, given the first part of the sentence?

Fixed.

Line 574: “data is subsampled” -> “data being subsampled” ?

This sentence was poorly written and it has been rewritten as follows:

*We demonstrate this with an example from the science flight on 20190929 from UTC 03:00 to 05:00. To reduce the computational time required to run the retrieval the 1 Hz SPN-S and SSFR irradiance data is subsampled at 0.1 Hz before being processed.*

Line 577: “preforms” -> “performs”

All incorrect instances of “preforms” have been changed to performs.

# Above-aircraft cirrus cloud and aerosol optical depth from hyperspectral irradiances measured by a total-diffuse radiometer

Matthew S. Norgren<sup>1</sup>, John Wood<sup>2</sup>, K. Sebastian Schmidt<sup>1,3</sup>, Bastiaan van Dierenhoven<sup>4,5</sup>, Snorre A. Stamnes<sup>6</sup>, Luke D. Ziemba<sup>6</sup>, Ewan C. Crosbie<sup>6</sup>, Michael A. Shook<sup>6</sup>, A. Scott Kittelman<sup>3</sup>, Samuel E. LeBlanc<sup>7,8</sup>, Stephen Broccardo<sup>7,8,9</sup>, Steffen Freitag<sup>10</sup>, Jeffery S. Reid<sup>11</sup>

<sup>1</sup>Laboratory for Atmospheric and Space Physics, University of Colorado, Boulder, CO, USA

<sup>2</sup>Peak Design Ltd, Sunnybank House, Wensley Rd, Winster, Derbys, DE4 2DH, UK

<sup>3</sup>Department of Atmospheric and Oceanic Sciences, University of Colorado, Boulder, USA

<sup>4</sup>SRON Netherlands Institute for Space Research, Utrecht, Netherlands

10 <sup>5</sup>NASA Goddard Institute for Space Studies, New York, NY, USA

<sup>6</sup>NASA Langley Research Center, Hampton, VA, USA

<sup>7</sup>Bay Area Environmental Research Institute, Moffett Field, CA, USA

<sup>8</sup>NASA Ames Research Center, Moffett Field, CA, USA

<sup>9</sup>Universities Space Research Association, Columbia, Maryland, USA

15 <sup>10</sup>Department of Oceanography, University of Hawaii at Manoa, Honolulu, HI, USA

<sup>11</sup>Marine Meteorology Division, U.S. Naval Research Laboratory, Monterey, CA, USA

*Correspondence to:* Matthew S. Norgren (matthew.norgren@colorado.edu)

20

**Abstract.** This study develops the use of spectral total and diffuse irradiance measurements, made from a prototype hyperspectral total-diffuse Sunshine Pyranometer (SPN-S), to retrieve layer fine-mode aerosol ( $\tau_{aer}$ ) and total optical depths from airborne platforms. Additionally, we use spectral analysis in an attempt to partition the total optical depth into its  $\tau_{aer}$  and cirrus cloud optical depth ( $\tau_{cld}$ ) components in the absence of coarse-mode aerosols. Two retrieval methods are developed: one leveraging information in the diffuse irradiance, and the other using spectral characteristics of the transmitted direct beam, with each approach best suited for specific cloud and aerosol conditions. SPN-S has advantages over traditional sun-photometer systems including no moving parts and a low cost. However, a significant drawback of the instrument is that it is unable to measure the direct beam irradiance as accurately as sun-photometers. To compensate for the greater measurement uncertainty of the radiometric irradiances these retrieval techniques employ ratioed inputs or spectral information to reduce output uncertainty. This analysis uses irradiance measurements from SPN-S and the Solar Spectral Flux Radiometer (SSFR) aboard the National Aeronautics and Space Administration's (NASA) P-3 aircraft during the 2018 deployment of the Observations of Aerosols above CLouds and their intERactionS (ORACLES) campaign and the 2019 Cloud, Aerosol and Monsoon Processes Philippines Experiment (CAMP<sup>2</sup>Ex) mission to quantify above-aircraft cirrus  $\tau_{cld}$  and derive vertical profiles of layer  $\tau_{aer}$ . Validation of the  $\tau_{aer}$  retrieval is accomplished by comparison with collocated measurements of direct solar irradiance made by the Sky-Scanning Sun-Tracking Atmospheric Research (4STAR) and in situ measurements of aerosol optical depth. For the aggregated 2018 ORACLES results, regression between the SPN-S based method and sun-photometer  $\tau_{aer}$  values yield a slope of 0.96 with an  $R^2$  of 0.96, while the root-mean-square error (RMSE) is  $3.0 \times 10^{-2}$ . When comparing

35

the retrieved  $\tau_{aer}$  to profiles of integrated in situ measurements of optical extinction, the slope,  $R^2$ , and RMSE values for ORACLES are 0.91, 0.95,  $3.4 \times 10^{-2}$ , and for CAMP<sup>2</sup>Ex are 0.94, 0.97,  $3.4 \times 10^{-2}$  respectively.

40 This paper is a demonstration of methods for deriving cloud and aerosol optical properties in environments where both atmospheric constituents may be present. With improvements to the low-cost SPN-S radiometer instrument, it may be possible to extend these methods to a broader set of sampling applications, such as ground-based settings.

## 1 Introduction

Clouds and aerosol particles both play important roles in controlling the flux of solar radiation through the Earth's atmosphere. Despite their relevance to the broader climate system and Earth's radiative balance, significant uncertainty exists in quantifying the optical properties of atmospheric systems containing one or both constituents. Traditional passive remote sensing methods retrieve aerosol properties in the absence of clouds (Holben et al., 1998; Levey et al., 2013). This is because when clouds are thick their radiative signal is large in relation to the aerosol signal, and when clouds are thin it is difficult to separate the two signals. For automated aerosol optical depth ( $\tau_{aer}$ ) retrievals, the challenge of cloud detection and removal is a significant hurdle to overcome (Smirnov et al., 2000; Remer et al., 2012; Spencer et al., 2019, [Yang et al., 2019](#)). Advanced methods, such as the spectral deconvolution algorithm (SDA) have been developed to differentiate between fine- and coarse-mode  $\tau_{aer}$  using spectral sun-photometry data (O'Neill et al., 2003), though these techniques are limited when cirrus ~~are~~ is present (Smirnov et al., 2018). Conversely, retrieval of cloud optical depth ( $\tau_{cl}$ ) tends to be insensitive to the aerosol loading of the local environment because clouds are often much thicker optically than aerosols. A common exception to this occurs when thin cirrus clouds are present. Reported values for mean cirrus cloud optical depth vary regionally (Giannakaki et al., 2007; Dai et al., 2019), but tend to be less than a value of unity (Kox et al., 2014, Heymsfield et al., 2017; Zhou et al., 2018). Since it is common for cirrus to have optical depths similar to those of aerosols, which typically have values less than 4 in equatorial regions (Torres et al., 2002), remote sensing of the optical depth of either constituent is complicated by the presence of the other. Other thin cloud types, such as low-level clouds in the Arctic, can have relatively high rates of occurrence and therefore pose challenges when using remote sensing techniques to study cloud or aerosol optical properties. For the case of thin Arctic clouds, Garrett and Zhao (2013) demonstrated the utility of thermal spectral remote sensing to derive the optical properties when the clouds have an emissivity less than unity.

The necessity of retrieving both aerosol and cirrus cloud optical properties is supported by the fact that aerosols are ubiquitous throughout Earth's atmosphere and cirrus clouds are globally prevalent (Sassen et al., 2008). Cirrus presence is especially high in equatorial regions where their frequency of occurrence can be near 50 percent ([Sassen et al., 2008](#), [Zou et al., 2020](#)). Overlying cirrus limits remote sensing of cloud and aerosol properties by passive airborne radiometers and polarimeters (e.g., Werner et al. 2013; Stamnes et al. 2018), and ground-based sun-photometer retrievals of  $\tau_{aer}$  frequently suffer from contamination by these clouds (Chew et al., 2011). In the past, attempts have been made to account for and correct

retrievals of  $\tau_{aer}$  for the impact of cirrus (Lee et al., 2013). Efforts have also been made to use sun-photometry to derive cirrus  
70  $\tau_{cld}$  (Kinne et al., 1997; Segal-Rosenheimer et al., 2013), but work towards joint  $\tau_{cld}$  and  $\tau_{aer}$  retrieval is limited.

In this paper we address some of the issues associated with remote sensing of thin cloud and aerosol systems by leveraging the capabilities of a new hyperspectral total-diffuse radiometer, SPN-S. The advantage of this radiometer system is that it is low-cost and deployable to a wide range of environments. The device is mechanically simple, with a fixed shadow mask used to block the direct beam of the Sun to make measurements of the diffuse irradiance. This shadow mask design  
75 allows for simultaneous measurements of both the total and diffuse fluxes, which is functionality that traditional rotating shadow band radiometer systems cannot obtain. The concurrent sampling of the two irradiances is useful in airborne, or other dynamic, settings where scenes can change rapidly. However, radiometer systems like SPN-S, have higher measurement uncertainties than sun-photometer systems, which limits their ability to investigate atmospheric optical properties. To compensate for lower accuracy, we propose a method for deriving  $\tau_{cld}$  of thin clouds using narrowband measurements of the  
80 diffuse to total ratio ( $DR$ ). This Diffuse Ratio Method, which will be referred to as RD, is advantageous for the study of thin clouds ( $\tau < 1$ ) because its main radiometric input is a ratio of two measured irradiances made from the same instrument, which reduces absolute calibration-induced errors. ~~This use of the ratio leaves the main sources of uncertainty as the instrument precision and assumptions made in the retrieval itself, resulting in RD being highly sensitive to small variations in optical depth. By using the ratio of two radiometric quantities as the retrieval input, the measurement uncertainty affecting the retrieval~~  
85 output is strongly dependent on the instrument precision, which is low in relation to the overall radiometric calibration of the system. As a result, the RD method reliably detects thin clouds because it is highly sensitive to small variations in optical depth. The concept of using a ratio of two spectral measurements to study thin clouds has been previously developed by Garrett and Zhao (2013) who used a ratio of measured thermal emission to study thermodynamic phase and optical properties of thin Arctic clouds. A second method, that we refer to as the Spectral Direct Beam Method (RS), uses measurements of the direct  
90 irradiance to develop optical depth spectra. The shape of the spectral optical depth curve contains information on the loading of fine-mode and large, coarse-mode particles in the atmosphere. In the absence of coarse-mode aerosols we show the potential to retrieve  $\tau_{aer}$  and  $\tau_{cld}$  values.

The two methods presented in this study overlap with previous cloud and aerosol retrieval techniques. DR has been used to study aerosol single-scattering albedo and asymmetry parameter properties using measurements from Multi-filter  
95 Rotating Shadow Band Radiometers (MFRSR; Kassianov et al., 2007; Herman et al., 1975). Although MFRSR is the most widely-used total-diffuse radiometer system, past work utilizing the instrument has relied on the direct irradiance measurement when deriving  $\tau_{aer}$  (Michalsky et al., 2010). Likewise, the use of spectral shape of the transmitted direct beam in the RS method is similar to the SDA method developed by O'Neill et al. (2003). However, MFRSR and sun-photometer systems require extensive alignment and precise operating conditions, making these past methods not applicable to airborne settings  
100 and restricting them to use at the surface. Extending these previous works, and then using them in conjunction with a shadowmask-designed radiometer, allows for a broader set of applications. Specifically, the use of the SPN-S in airborne



settings (or other non-stationary environments) is a novel application of a spectral total-diffuse radiometer system which allows for greater detail of the atmospheric aerosol and cloud structure to be known.

This paper describes the theoretical underpinnings of the retrievals in Section 2, along with a justification of which method is best suited for specific atmospheric conditions. Section 3 overviews the data used in the study from two airborne field campaigns: the 2018 deployment of the ObseRvations of Aerosols above CLouds and their intERactionS (ORACLES) campaign conducted over the Southeast Atlantic Ocean, and the 2019 Cloud, Aerosol and Monsoon Processes Philippines Experiment (CAMP<sup>2</sup>Ex) mission conducted above the waters surrounding the Philippines. Section 3 follows with a detailed accounting of the retrieval algorithm implementation using the field measurements. Section 4 presents the results: first a comparison of retrieved  $\tau_{aer}$  values to co-located  $\tau_{aer}$  measurements made by a sun-photometer as well as in situ measurements of the aerosol optical depth. Then summary statistics of the ORACLES and CAMP<sup>2</sup>Ex campaigns are shown. Section 5 is a discussion of limitations and usefulness of the two new methods. Section 6 provides a brief summary of the manuscript.

## 2 Theory and approach

The attenuated direct solar radiation in a layered model of the atmosphere is directly related to the layer optical depth by Beer's Law:

$$F_{dir} = F_0 e^{-\tau/\mu} \quad \text{Eq. 1}$$

where  $F_{dir}$  is the direct beam irradiance,  $F_0$  is the incident irradiance at the top of the layer,  $\mu$  is the airmass factor which we approximate as the cosine of the solar zenith angle (SZA), and  $\tau$  is the layer optical depth. Inverting Equation 1 is frequently invoked to derive optical depth from measurements of  $F_{dir}$ .

Conversely, the two-stream approximation of the Radiative Transfer Equation can be used to relate the downwelling diffuse irradiance to the optical depth (Bohren and Clothiaux, 2006, eq.5.66, p.263):

$$\frac{F_{dif}}{F_0} = \frac{1}{1 + \tau(1-g)/2\mu} - e^{-\tau/\mu} \quad \text{Eq. 2}$$

where  $g$  is the asymmetry parameter of the single atmospheric layer (the mean cosine of the scattering angle, which in the context of the two-stream approximation is a parameter used in the two-stream approximation to that describes the relative amounts of forward and backwards scattering within a layer), and  $F_{dif}$  is the downwelling diffuse irradiance. It is important to note that Eq. 2 assumes no absorption and the atmospheric layer is above a black surface. By solving Eq. 1 for  $F_0$ , substituting this into Eq. 2, and consolidating all the irradiance terms to the left-hand side, we get an expression relating the diffuse ratio (DR) to optical depth:

$$Diffuse Ratio (DR) = \frac{F_{dif}}{F_{dir} + F_{dif}} = 1 - (1 + \tau(1 - g)/2\mu)e^{-\tau/\mu} \quad \text{Eq. 3}$$

In the thin cloud limit:

$$\frac{\tau(1-g)}{2\mu} \ll 1 \quad \text{Eq. 4}$$

Eq. 3 simplifies to:

$$DR = 1 - e^{-\tau/\mu}$$

Eq. 5

135 and the dependence of  $DR$  on  $g$  is minimal. Crucially, Eq. 3 and Eq. 5 are not dependent on  $F_0$ , which allows for knowledge of  $\tau$  to be obtained without information (or assumptions) of the irradiance incident upon the layer. These equations give us two relationships between observables,  $DR$  and  $F_{dir}$ , to optical depth. Eq. 1 and Eq. 3 form the basis of the two retrieval methods: (1) using  $DR$  to derive  $\tau_{cld}$ ; and (2) exploiting spectral features of  $F_{dir}$  to partition  $\tau$  into  $\tau_{cld}$  and  $\tau_{aer}$  components.

## 2.1 Diffuse Method, RD – $\tau_{cld}$ retrieval

140 Equation 3 directly links  $DR$  to optical depth for cases when the extinction of the layer is solely caused by scattering. Cloud particles have minimal absorption coefficients for light at visible wavelengths (Bohren and Huffman, 1998) and therefore a single-scattering albedo (SSA) near unity. Fine-mode aerosols are commonly absorbing, while coarse-mode aerosols, such as sea-salt and dust, have similar ~~absorption~~ scattering characteristics to clouds, both of which limits the application of RD to samples without aerosols (the implications aerosols have on RD are discussed in more detail in Section 5). Given these constraints, Eq. 3 can be solved to derive cloud optical depth. We apply this model specifically to retrieve cirrus cloud optical depth because, as we will show in Section 2.3,  $DR$  is most sensitive to changes in  $\tau$  when  $\tau$  is small. At 145 optical depths  $\tau_{cld} > \sim 5$ ,  $DR$  asymptotes to unity, leaving little information on  $\tau$ .

At smaller cloud optical depths, when direct beam is still present ( $\tau_{cld} < \sim 5$ ),  $DR$  is linked to the amount of forward scattering promoted by the cloud medium, and therefore a source of uncertainty in RD is incomplete knowledge of  $g$  (or the 150 full scattering phase function). For cirrus clouds  $g$  typically ranges from 0.7 to 0.9 (Fu, 2007). Likewise, surface albedo,  $a$ , impacts  $DR$  through a process of multiple scattering of light between the surface and the cloud layer. Since the analytic solution in Eq. 3 does not account for the impact of surface albedo on  $DR$ , we use a radiative transfer model (RTM) to accurately represent the sampled environment and implement the retrieval. In the field settings, the flight-level  $a$  ( $a_{fl}$ ) is directly inferred by ratioing downwelling and upwelling total irradiance measured by SPN-S and Solar Spectral Flux Radiometer (SSFR) 155 respectively.

The retrieval steps or the RD method are simple:

1. Given a measurement of diffuse ratio,  $DR_{mea}$ , we solve Eq. 5 to make an initial estimate of the cloud optical depth,  $\tau_{est}$ .
- 160 2.  $\tau_{est}$  and measured flight-level albedo,  $a_{fl}$ , are used as inputs into the RTM to simulate a diffuse ratio,  $DR_{sim}$ .  $g$  is set to 0.85 in the RTM.
3.  $DR_{sim}$  to  $DR_{mea}$  are compared:
  - 3.1. If the difference is greater than  $\pm 1\%$   $\tau_{est}$  is adjusted by a small amount,  $\tau_{est} = \tau_{est} \pm \Delta\tau$ , and step 2 is repeated.
  - 3.2. If the difference is less than  $\pm 1\%$ ,  $\tau_{cld} = \tau_{est}$ .

165 4. The  $\tau_{cld}$  value has bias induced by the wide field-of-view (FOV) of the SPN-S, and this bias is corrected for in certain sampling settings. Details of the FOV correction are found in Section 3.2 and Appendix A.

The details and specifics of the measurements and RTM used in the diffuse method, RD, will be discussed in Section 3 of this paper.

## 2.2 Spectral Direct Beam Method, RS – $\tau_{cld}$ , $\tau_{aer}$ retrieval

170 The Spectral Direct Beam Method, RS, leverages the differences in the spectral dependence of layer optical depth containing small (fine-mode) and large (coarse-mode) particles. Layers containing small particles, with sizes roughly that of the wavelength of visible light, have a strong wavelength dependence in optical depth. For fine-mode aerosols  $\tau_{aer,\lambda}$  can be described by:

$$\tau_{aer,\lambda} = \tau_{aer,0} \left( \frac{\lambda}{\lambda_0} \right)^{-AE} \quad \text{Eq. 6}$$

175 where the lambda subscript of the  $\tau_{aer,\lambda}$  term indicates a spectral dependence to the optical depth,  $\tau_{aer,0}$  is the optical depth at a reference wavelength  $\lambda_0$ , and  $AE$  is the Ångström exponent (Ångström, 1929).

Larger particles, such as coarse-mode aerosol (e.g., sea salt or dust) and cloud hydrometeors, reside close to, or in the geometric scattering regime at visible wavelengths and therefore have low  $AE$  values. This results in minimal wavelength dependence of  $\tau$  (i.e., are largely spectrally flat in the visible) of atmospheric layers containing these large particles. In an atmospheric system containing fine-, but no coarse-, mode aerosols, we expect the spectral total layer optical depth to be of the form:

$$\tau_\lambda = \tau_{cld,\lambda} + \tau_{aer,\lambda} = \tau_{cld} + \left[ \tau_{aer,0} \left( \frac{\lambda}{\lambda_0} \right)^{-AE} \right] \quad \text{Eq. 7}$$

In practice we use Beer's Law, Eq. 1, to determine  $\tau_\lambda$ , where this spectral optical depth is also represented by the summation of all atmospheric constituents with non-zero optical depth:

$$185 \tau_\lambda = \tau_{cld,\lambda} + \tau_{aer,\lambda} + \tau_{Ray,\lambda} + \tau_{mol,\lambda} \quad \text{Eq. 8}$$

where  $\tau_{Ray,\lambda}$  is the spectral optical depth from Rayleigh scattering, and  $\tau_{mol,\lambda}$  is a term encompassing non-Rayleigh extinction from trace gas molecular scattering and water vapor absorption sources. In the wavelength range used in this analysis there is optical depth from trace gases and water vapor, but rather than measure or calculate the  $\tau_{mol,\lambda}$  term, we select wavelengths that minimize its value. Further, we apply a correction to the derived  $\tau_\lambda$  based on measured values of  $\tau_\lambda$  from above the aerosol layer (see Section 3.5.2). That is, we are calculating a layer aerosol optical depth, and in doing so we account for much of the influence of  $\tau_{mol,\lambda}$  on  $\tau_\lambda$ . Future work may want to treat the  $\tau_{mol,\lambda}$  term with more detail which would possibly allow for column, and not layer,  $\tau_{aer,\lambda}$  to be retrieved. Then if wavelengths are selected that minimize  $\tau_{mol,\lambda}$ ,  $\tau_\lambda$  is dependent on  $\tau_{cld}$ ,  $\tau_{aer,\lambda}$ , and  $\tau_{Ray,\lambda}$ .  $\tau_{Ray,\lambda}$  can be solved for empirically and is a function of the pressure differential across the observed layer:

$$190 \tau_{Ray,\lambda} = c_1 \left[ \frac{c_2 - c_3 \lambda^2 - c_4 \lambda^{-2}}{1 - c_5 \lambda^2 - c_6 \lambda^{-2}} \right] \left( \frac{\Delta P}{1013.25} \right) \quad \text{Eq. 9}$$

195 where  $\Delta P$  is the pressure differential across the layer in millibar,  $c_1 = 2.10966 \times 10^{-3}$ ,  $c_2 = 1.0455996$ ,  $c_3 = 341.29061$   
 $\mu\text{m}^{-2}$ ,  $c_4 = 9.02308508 \times 10^{-1} \mu\text{m}^{-2}$ ,  $c_5 = 2.7059889 \times 10^{-3} \mu\text{m}^{-2}$ ,  $c_6 = 85.968563 \mu\text{m}^{-2}$  (Bodhaine et al., 1999; Hansen  
and Travis 1974). Using Eq. 9 to calculate and account for the  $\tau_{Ray,\lambda}$  term in Eq. 8, the spectral shape of the layer optical depth  
dictated by Eq. 7 can be described in terms of  $\tau_{cld}$  and  $\tau_{aer,\lambda}$ . An example of this is illustrated in Figure 1 for simulated optical  
depths (RTM configuration is given in Section 3.3) for a case with a cloud only (blue lines) and cloud with aerosol (red lines).  
200 A set of selected retrieval wavelengths, designated by the yellow shading, represents regions of the spectrum where  $\tau_{mol}$  is  
minimal (additionally the shaded regions correspond with usable channels from SPN-S; more in Section 3). For the aerosol-  
free case within the selected wavelengths region, the  $\tau_\lambda$  profile which accounts for the  $\tau_{Ray}$  term (dashed blue line)<sub>2</sub> falls nearly  
along a flat line of the simulated cloud optical depth value of  $\tau_{cld} = 0.20$ . When fine-mode aerosols are present,  $\tau_\lambda$  is curved  
in the form of Eq. 7, and asymptotes to a value of  $\tau_{cld} = 0.20$  at longer wavelengths. The aerosol optical depth is simply the  
205 difference in the layer and cloud optical depths at 500 nm:  $\tau_{aer,500nm} = \tau_{500nm} - \tau_{cld}$ .

In practice RS is implemented as follows:

1. Spectral measurements of direct irradiance,  $F_{dir}$ , are used to determine  $\tau_{mea,\lambda}$  using Beer's Law, Eq. 1.
2. Wavelengths in window channels are selected that minimize the  $\tau_{mol,\lambda}$  term in Eq. 8.
- 210 3.  $\tau_{mea,\lambda}$  is characterized above the aerosol layer and used to correct all profile samples of  $\tau_{mea,\lambda}$  for the influence  
of  $\tau_{mol,\lambda}$ .
4.  $\tau_{Ray,\lambda}$  is calculated from Eq. 9 and then subtracted from the corrected  $\tau_{mea,\lambda}$ .
5. A set of calculated layer optical thicknesses,  $\tau_{calc,\lambda}$ , are found using Eq. 7 for a range of  $\tau_{cld}$ ,  $\tau_{aer,0}$ , and  $AE$   
values.
- 215 6. The root-mean-square error (RMSE) is found for each combination of  $\tau_{calc,\lambda}$  and  $\tau_{mea,\lambda}$  profiles. The retrieval  
outputs—  $\tau_{cld}$ ,  $\tau_{aer}$ , and  $AE$  —are the values corresponding to the  $\tau_{calc,\lambda}$  with the lowest RMSE.
7. Field-of-view correction applied to the  $\tau_{cld}$  retrieval output (see Section 3.2 and Appendix A).

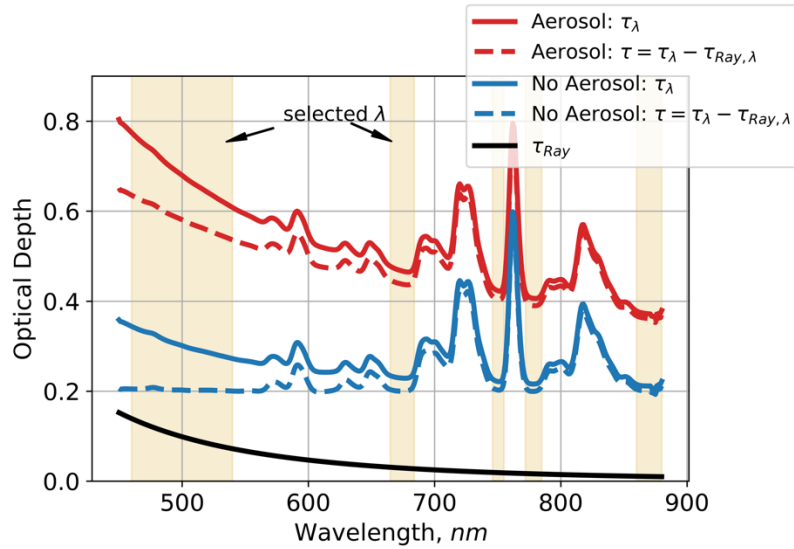

**Figure 1:** Simulated spectral  $\tau_\lambda$  for two cases: cloud only,  $\tau_{cld} = 0.20$ ,  $\tau_{aer,500nm} = 0.00$ , is denoted by the blue lines. And a case with cloud and aerosols,  $\tau_{cld} = 0.20$ ,  $\tau_{aer,500nm} = 0.38$ , shown by the red lines. The solid black line is calculated  $\tau_{Ray,\lambda}$ . Subtracting  $\tau_{Ray,\lambda}$  from  $\tau_\lambda$  yields the dashed red and blue lines, which are represented by Eq. 7. The shaded yellow regions are the wavelengths selected for use in RS. For the aerosol free case, the layer optical depth is spectrally flat at the value of  $\tau_{cld}$ .

### 2.3 RD and RS comparison and use selection consideration

Without knowledge of the output uncertainties of the two methods, the separation of the aerosol from the cloud  
 220 radiative signal makes RS the more capable of the two retrieval methods. However, RS is based on measuring  $F_{dir}$ , which is  
 a measurement that is susceptible to significant errors when made from airborne platforms. For SPN-S, the main error sources  
 of the irradiance measurements are the result of improper radiometric calibration, the sensor cosine response, and errors  
 associated with the attitude of the sensor relative to the horizon. RD *has the advantage of being derived from the ratio of two*  
*irradiances simultaneously measured by the same instrument.* In the case of SPN-S, the diffuse and total irradiance  
 225 measurements are made by the same sensor which allows us to assume the radiometric uncertainties of  $F_{dif}$  and  $F_{tot}$  are  
 correlated, and therefore the uncertainty of  $DR_{mea}$  is a function of the instrument precision, and not the accuracy. Further, DR  
 is minimally affected by sensor attitude errors because the  $F_{dir}$  term is in the denominator. However, there are additional  
sources of measurement uncertainty related to the SPN-S system that are important to consider, such as internal reflections  
caused by the shadow mask that can lead to bias in the measured diffuse irradiance. Internal reflections are a problem inherent  
 230 to total-diffuse radiometer systems reliant on shadow mask (and shadow band) designs, and a detailed discussion of how these,  
and related, issues have been addressed for the SPN-S are given in Badosa et al. (2014). -For SPN-S irradiance measurements

we estimate a 4 – 6% accuracy uncertainty results from the lamp calibration process and up to another 2% uncertainty stems from imperfect knowledge of the cosine response of the sensor. For the sake of this analysis, we will use uncertainty values of 7% accuracy and 0.5% for precision (Wood et al., 2017). There are additional sources of error (e.g., changes in sensor attitude) that will be addressed in the following sections.

The performance of both retrieval methods is gauged considering the uncertainty of the inputs. First, we evaluate Eqns. 1 and 3 for a range of  $\tau$  values. Figure 2 shows the profile of the direct transmittance,  $T_{direct} = F_{dir}/F_0$  (green line), given a 7.0% uncertainty in  $F_{dir}$ . At high values of  $T_{direct}$  (low  $\tau$ ), the measurement uncertainty is a significant proportion of the signal, leading to substantial ambiguity in the associated value of  $\tau$ . As optical depths increase,  $T_{direct}$  falls off exponentially at the same rate as its error, meaning the absolute error in  $\tau$  is constant, and hence the fractional error decreases as the cloud layer thickens. For RD the uncertainty on  $DR$  is minimal, and so for a known value of  $g$  the retrieved  $\tau$  has little ambiguity until the  $DR$  signal starts to asymptote to unity at values  $\tau > \sim 5$ . However, the uncertainty in the value of  $g$  is a main source of error when determining  $\tau$  at low optical depths. The pink and purple lines are  $DR$  profiles for  $g$  ranging from 0.5-1.0. At low values of  $DR$ , when scattering is minimal, the uncertainty in  $g$  leads to relatively little ambiguity in the value of  $\tau$  (i.e.,  $g$  is not represented in Eq. 5). As the cloud optical depth increases, greater amounts of scattering occur and the importance of  $g$  on  $DR$  becomes more pronounced, leading to poorer retrieval performance. Fortunately, the two methods for deriving  $\tau$  are complimentary – RD has lower uncertainty in retrieving thin cloud  $\tau$  whereas the use of RS is justified as  $\tau$  becomes larger. This threshold at which the output uncertainty of RS falls below RD is approximately when  $\tau \sim 1$ , though this level is dependent on how well  $g$  is constrained and the level of uncertainty of the inputs. Both methods lose utility as  $\tau$  becomes large and the light becomes completely diffuse.

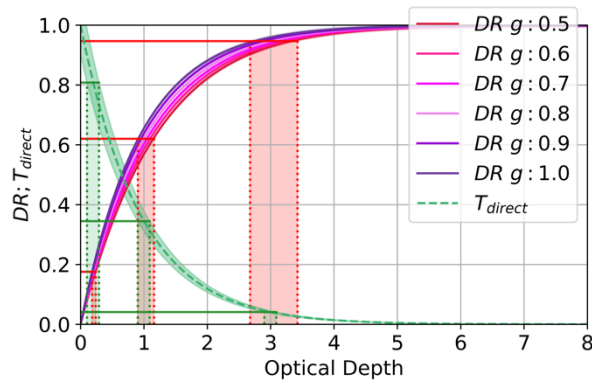

**Figure 2:** Solutions given the direct transmittance using Beer’s Law (Eq. 1) and the diffuse ratio (Eq. 3) giving layer optical depth. Shown are uncertainties in optical depth for irradiances associated with layer optical depths of 0.2, 1.0, and 3.0. Uncertainty in  $F_{dir}$  is 7.0%, and uncertainty in  $DR$  is 0.5%.

To further address the question of retrieval performance, we test the explicit retrieval methods used in this study (outlined in Sections 3.4) on model-generated irradiance data. To do this we simulated a set of spectral irradiances using a RTM (see Section 3.3) for values of  $\tau_{cld}$  ranging from 0 to 6. The cloud optical properties in the simulations were generated using the “hey” ice cloud parameterizations that are a part of the public libRadtran package (Yang et al., 2013; Emde et al., 2016). For this example, a cloud comprised of smooth solid-column ice crystals with an effective radius of  $20 \mu\text{m}$  was inserted in the atmosphere with a base height of 10 km, and we set  $a = 0.15$ . In practice, we directly infer  $a$  using SPN-S and SSFR measurements, so in this exercise we do not investigate the influence of albedo on the retrieval error. The  $DR$  profiles are calculated at three values of  $g$ : 0.70, 0.85, 0.95. The simulated inputs,  $F_{dir}$  for RS and  $DR$  for RD, are then injected into both retrieval structures, and the outputs compared to the true values of  $\tau_{cld}$  – the values of  $\tau_{cld}$  set in the RTM simulations.

Figure 3 shows the results of this experiment. The left panel is the simulated 500 nm downwelling irradiances. The middle panel shows the retrieved values of  $\tau_{cld}$  plotted against the true  $\tau_{cld}$ , and the right panel is the error in retrieved  $\tau_{cld}$  value as a function of true  $\tau_{cld}$ . ~~The results support the analysis of the analytic functions presented in Figure 2: RD outputs have less error and RD is therefore the superior method when  $\tau_{cld} < \sim 1$ , and RS retrieves  $\tau_{cld}$  with less error for optical depths above unity. The results support the analysis of the analytic functions presented in Figure 2: when  $\tau_{cld} < \sim 1$  the output of the RD method has less uncertainty in the retrieved optical depth making it the superior method. When  $\tau_{cld}$  is greater than unity, there is less uncertainty associated with the retrieved optical depth from the RS method.~~ It is critical to note that this analysis of cloud simulations assumes an absence of aerosols. If absorbing aerosols are present, knowledge of SSA and  $g$  are needed to accurately use RD to retrieve optical depth.

~~One other~~ Another limitation that is worth mentioning: the output of RD falls below the identity line because of difference in the scattering phase functions used in the simulated data and the  $DR$  calculations in the retrieval. In RD, the phase function is approximated using the Henyey-Greenstein phase function for a given value of  $g$ , while the simulated data uses full phase functions for clouds layers containing solid-column ice crystal habit from the libRadtran library. We use Henyey-Greenstein in the retrieval to make it more broadly applicable to various atmospheric conditions and to avoid making assumptions about the cloud microphysics.

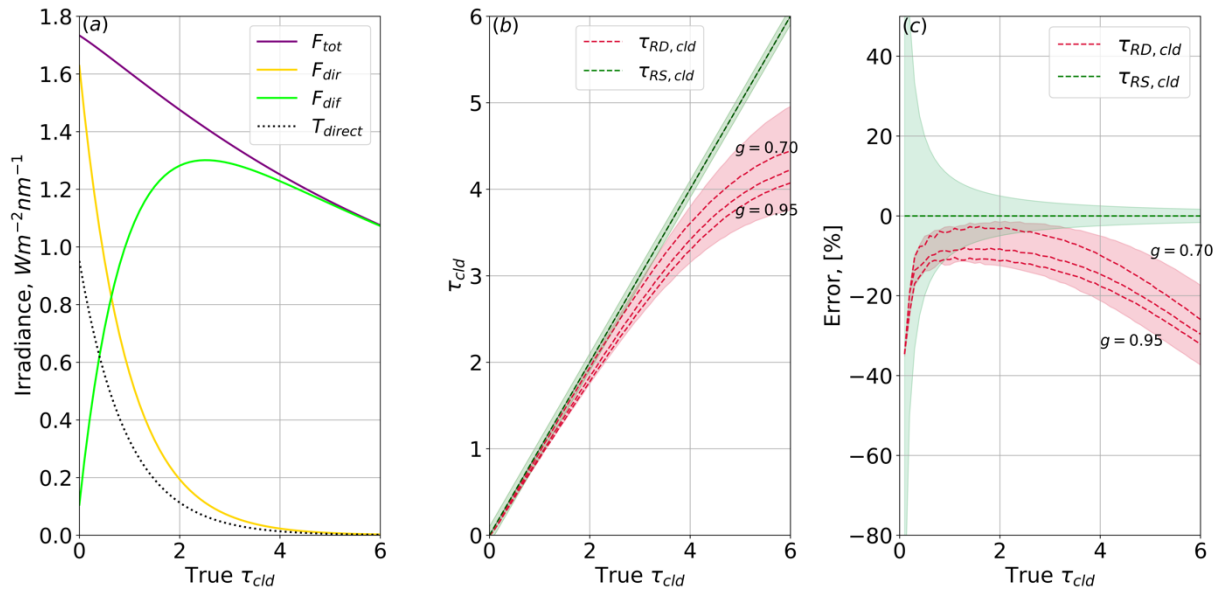

**Figure 3:** (a) Simulated 500 nm irradiances at 4 km altitude, with an ice cloud situated at 10 km. Solar zenith angle is 20 degrees, ice crystal effective radius is 20  $\mu m$ , and the model output level is 4 km. (b) Retrieval outputs with the simulated irradiances used as inputs. Error of  $F_{dir}$  is 7.0%, error of  $DR$  is 0.5%. The uncertainty in retrieval output is represented by the shading. For RD, this uncertainty also reflects  $g$  values of 0.70, 0.85, 0.95. (c) Percent error of the two retrieval methods when compared to the true cloud optical depth.

### 3 Data and implementation:

280 This section details the data sources used in the retrievals and in validation of their outputs. Additionally, the RTM  
 used throughout this study is described. This is followed by a detailed explanation of the procedures used to implement RS  
 and RD with the field data.

#### 3.1 ORACLES and CAMP<sup>2</sup>Ex campaigns

285 The data used in this study come from two independent field campaigns that occurred in climatically different tropical  
 to subtropical regions of the globe. Both campaigns used the National Aeronautics and Space Administration's (NASA) P-3  
 aircraft equipped with a set of radiometric and in situ scientific instruments, with the goal of addressing questions surrounding  
 cloud and aerosol impacts on atmospheric state. Specifically, ORACLES was a three-part mission focused on studying the  
 radiative effects of biomass burning generated aerosols present above clouds. Sampling of the aerosol plume was done over  
 290 the eastern Atlantic Ocean after it had advected off the west coast of the African continent. The experiment environment at  
 ORACLES was stratified – with a persistent aerosol layer sitting below clear-skies (i.e., minimal cirrus clouds). A stratus cloud  
 layer, of varying cloud fraction, was often found below or at the bottom of the aerosol layer. While cirrus did tend to occur in



the sampling region, flight planning was done to avoid their presence. This environment allowed for measurements of aerosol properties to be made with minimal influence from surrounding clouds, outside of the impact the low cloud layer had on albedo. The science flights took place in August-October of 2016-2018. The SPN-S was only developed in time for operation during the 2018 deployment of the ORACLES mission. A complete overview of the ORACLES campaign is given by Redemann et al. (2020).

In contrast, CAMP<sup>2</sup>Ex took place from late August through early October of 2019, in the maritime environments surrounding the island of Luzon, Philippines. This location was selected because polluted airmasses from Borneo and Sumatra could be characterized as they are transported through the South China Sea and Sulu Sea into the Western Pacific by the Maritime Continent's Southwest Monsoon flow. Sampling took place in several different airmasses which had variability in the aerosol source – local sources from industrial activity on Luzon (especially from Manila) and tanker ships, to biomass burning aerosols transported from Borneo, and long-range transport of aerosols from the Asian continent. Given the nature of the Southwest Monsoon, the cloud environment was highly dynamic, with cumulus clouds and convective cells of varying degrees of maturity present during all flight days. Unlike with ORACLES where cirrus could be avoided, during CAMP<sup>2</sup>Ex regional deep convection led to ubiquitous cirrus. It is this high prevalence of the cirrus clouds during the mission which provided much of the motivation for developing the spectral approaches for determining  $\tau_{clid}$  and  $\tau_{aer}$ . CAMP<sup>2</sup>Ex also sampled for 10 days after the monsoon transition, leading to lower cirrus optical depths and sampling of the heavily polluted Asian airmasses. For an overview of the CAMP<sup>2</sup>Ex mission, refer to Reid et al. (2021).

A note on sampling methods: during both campaigns we employed a “square-spiral” sampling technique to profile layers of the atmosphere up to two times per science flight. This is where the P-3 aircraft descends through the atmosphere, from high altitude flight to near surface, by making a box pattern. The box pattern consisting of four legs of descent, with wings held level (i.e., pitch and roll kept as close to 0° as possible), connected by 90° degree descending turns that are banked. The goal is to minimize the influence aircraft attitude has on the radiometers position relative to the horizon, thereby reducing the magnitude of the attitude correction that is needed in post-processing of the radiometric data. In comparison to a series of traditional flat “radiation legs”, the “square-spiral” method allows for relatively rapid profiling of the atmosphere, which is useful in dynamic environments such as the ones encountered in CAMP<sup>2</sup>Ex. At CAMP<sup>2</sup>Ex near-surface clouds were encountered in most spirals, and so for this study we restricted spiral profiles to altitudes greater than 0.4 km. At ORACLES the stratus deck was mostly found below 1 km, and we limit sampling to above this altitude.

### 3.2 SPN-S irradiances and retrieval input data

The SPN-S is a modified version of the commercially available broadband SPN1 pyranometer. Instead of the detector head directing the sampled light to a set of 7 thermopiles, this spectral version uses a 7-spectrometer array to measure irradiance from 350 to 1000 nm at 1 nm spectral resolution and 1 Hz temporal resolution. Detailed characterization of SPN1, and how the measurements of total and diffuse irradiance are made, is described in Badosa et al. (2014). The version of the SPN-S used in this study is most similar to the Spectrometer 1 system described in Wood et al. (2017), with modifications done to the

instrument chassis to allow it to be mounted in the top of the P-3 fuselage. We follow the procedure laid out in Wood et al. (2017) for deriving the spectral direct irradiance from the measurements of total and diffuse irradiance.

Our procedure for calibration and attitude correction deviates from the methods described in Wood et al., (2017). The SPN-S was calibrated against a tungsten ‘FEL’ lamp that is traceable to a National Institute of Standards and Technology (NIST) standard. The power of the ‘FEL’ lamp is significantly lower than the power of the solar radiation at the sampling sites and this led to issues with measuring irradiances at the shorter and longer wavelengths of SPN-S’s capabilities. For our analysis we only use sampled radiation from 460 to 900 nm due to these calibration constraints.

The direct beam and total irradiances were corrected for the pitch and roll of the aircraft in accordance with the attitude correction method outlined in Long et al., (2010). Due to time limitations of the P-3 aircraft and cloud cover constraints, we could not fly the recommended “box” and “diagonal” patterns needed to determine pitch and roll offset angles of the mounted SPN-S. Rather, we manually went through all the flight data from the ORACLES campaign, identified heading changes of the aircraft that occurred under clear-sky conditions ( $\overline{DRDR}_{500nm} < 0.1$ ), and used the collective set of these heading changes as a substitute for the “box” and “diagonal” patterns in the Long et al. (2010) method. Since SPN-S was mounted on the P-3 in the same configuration for the CAMP<sup>2</sup>Ex mission as it was during ORACLES, we assume the offset angles are constant across the two missions. To minimize the impact aircraft attitude has on the direct irradiance measurements we restrict our analysis to when both aircraft pitch and roll were less than  $\pm 3$  degrees.

To measure diffuse irradiance, the SPN-S uses a shadow mask to block the direct beam of the sun. The field-of-view (FOV) blocked by the sun is an area larger than the solar disk, and this wide FOV leads to understatement of the diffuse irradiance under sky conditions where there is a significant amount of light scattered in the direction of the direct beam (conversely, direct transmittance is overstated). This is similar to FOV issues encountered by sun-photometer systems (Segal-Rosenheimer et al., 2013). Thin cirrus cloud layers are associated with strong forward scattering, and the induced bias in the measured irradiances will cause underestimation of  $\tau_{cld}$  by both the RD and RS methods. We correct the  $\tau_{cld}$  outputs of both retrievals for errors associated with the FOV of SPN-S. This correction is done by developing an empirical relationship from radiance simulations that associates the magnitude of the irradiance bias induced by the FOV error to the true  $\tau_{cld}$  – the details of the correction are explained in Appendix A.

RD requires measurements of  $a_{fl}$ , which is derived from flux measurements made by two sensors. The spectral total upwelling irradiance,  $F_{up}$ , is measured by a nadir mounted Solar Spectral Flux Radiometer (SSFR, Pilewskie et al., 2013). SSFR is a moderate resolution total irradiance spectrometer system with a spectral range of 350-2100 nm. Like SPN-S, SSFR is radiometrically calibrated against a NIST traceable lamp standard before and after each field campaign. Throughout the duration of each campaign, a series of field-calibrations were used to monitor and correct for variations in the primary radiometric calibration. Since the upwelling irradiance is diffuse, the signal is only minorly impacted by the angular response of the SSFR light collector. A spectrally dependent factor that accounts for the angular response of the SSFR light collector to diffuse irradiance is determined through laboratory investigation. This factor has a value near unity and it is used to correct the

360 upwelling irradiance measurements to account for this angular dependence of the measured signal.  $a_{fl}$  is then determined by  
ratioing  $F_{up}$  to  $F_{tot}$ , the latter of which is measured by SPN-S.

Altitude, pressure, sun position and navigation data are measured at 1Hz aboard the P-3 as described in Bennett  
(2020).

### 365 **3.3 Radiative transfer model**

The simulated  $DR$  values used in RD are made using the Discrete Ordinates Radiative Transfer Program (DISORT)  
2.0 (Stamnes et al., 2000). We use the libRadtran library version 2.0.1 to configure and run DISORT 2.0 (Emde et al., 2016),  
with the base configuration set to:

- Molecular absorption is done using LOWTRAN 7, Pierluissi and Pang, (1985).
- 370 ○ Pressure, temperature, and gas mixing ratio profiles— including ozone and water vapor —are set using the  
Tropical Atmosphere profile from Anderson et al., (1986).
- Solar source: 1 nm resolution top of atmosphere flux from Kurucz, (1992).
- Slit function with a 6 nm full width at half maximum is used on the output of spectral calculations.
- Solar zenith angle and model output elevation were set to values corresponding to P-3 position and time of day.
- 375 ○ Flight-level spectral albedo,  $a_{fl}$ , from the SPN-S/SSFR measurements.

We simulated cirrus clouds by modifying the standard aerosol configuration in libRadtran which generates scattering phase  
functions from Henyey-Greenstein. A cloud layer was inserted between 10 – 11km and then we adjusted the layer optical  
depth to the appropriate  $\tau_{cld}$ . In this configuration, SSA was set to 1, and  $g = 0.85$  was used as a baseline value of the  
380 asymmetry parameter. All other simulated irradiances mentioned in the paper, e.g., Figure 1, used a similar model configuration  
with deviations noted in the text.

### **3.4 Validation data**

The Spectrometer for Sky-Scanning Sun-tracking Atmospheric Research (4STAR, Dunagan et al., 2013) is an  
385 airborne sun-photometer that makes direct-beam measurements of  $\tau_{aer}$  above the aircraft using spectrometers (similar to  
SSFR) spanning 350-1650 nm, with  $\tau_{aer}$  reported at 24 wavelengths outside of gas absorption bands. Before and after each  
field deployment 4STAR is calibrated at Mauna Loa Observatory using Langley extrapolation methods. Additionally, in-flight  
high-altitude calibration measurements are used as a calibration verification and adjustment throughout deployment (LeBlanc  
et al., 2020). The resulting uncertainty in 4STAR measured  $\tau_{aer}$  is as low as 0.007 at the 501 nm channel.

390 4STAR operated only during the ORACLES campaign so we also compared the derived  $\tau_{aer}$  values from the  
retrievals against in situ measurements of optical extinction ( $\tau_{insitu}$ ). For CAMP<sup>2</sup>Ex, total dry aerosol scattering was measured  
in situ by a TSI-3563 nephelometer at relative humidity (RH) less than 40%. To account for aerosol humidification, a parallel

TSI-3563 nephelometer was operated at an RH of  $82 \pm 10 \%$  and was used to derive the scattering hygroscopicity factor (i.e.,  $f(\text{RH})$ , Ziemba et al., 2013). Scattering coefficients for each measured wavelength (i.e., 450, 550, and 700 nm) at ambient RH are then calculated using dry scattering coefficients,  $f(\text{RH})$ , and ambient RH by the diode laser hygrometer (DHL, Diskin et al., 2002). Optical absorption coefficients were measured by a Radiance Research 3-wavelength particle soot absorption photometer (PSAP) at 430, 532, and 660 nm, with the sample dried by heating the air to 40°C. To develop altitude profiles of  $\tau_{insitu}$ , ambient extinction coefficients are computed as the sum of dry absorption coefficient and ambient scattering coefficient, after correcting both to 500 nm wavelength using measured scattering and absorption Ångström ~~angstrom~~ exponents and Eq. 6. The estimated uncertainties for the scattering and absorption coefficients are 30% and 15% respectively. For the square spiral maneuvers performed by the P-3, this total ambient extinction was integrated with respect to altitude to generate a  $\tau_{insitu}$  profile. Before integrating, 10 second averaging was applied to the timeseries to reduce the influence of noise artifacts on the profile. At ORACLES TSI-3563 nephelometers and Radiance Research PSAP were also flown, and measurements were processed in the same fashion as those from CAMP<sup>2</sup>Ex, with a caveat being a pair of Radiance Research M100 nephelometer were humidity controlled and used to determine ambient scattering at 540 nm and  $f(\text{RH})$ . At ORACLES, the Radiance Research M100 nephelometer data was used to derive ambient extinction at times when the ambient TSI-3563 nephelometer was not operational. All in situ measurements on the P-3 aircraft for both CAMP<sup>2</sup>Ex and ORACLES were made behind an isokinetic shrouded solid-diffuser inlet (McNaughton et al., 2007) and are reported at ambient temperature and pressure.

410

### 3.5 Retrieval implementation

#### 3.5.1 Diffuse Method, RD

Implementation of RD is straightforward, and we followed the steps outlined in Section 2.1 of this paper. For the 500 nm SPN-S channel,  $DR_{mea}$  is calculated directly from the measured  $F_{dif}$  and  $F_{tot}$ . The estimate of the optical depth,  $\tau_{est}$ , is made from  $DR_{mea}$  using Eq. 5.  $\tau_{est}$  is input into the RTM along with  $a_{fl}$ , to obtain a simulated value of  $DR_{sim}$ . If  $|DR_{mea}/DR_{sim} - 1| \leq 0.01$  the  $\tau_{est}$  is the reported  $\tau_{clid}$  value of the retrieval. If  $DR_{mea}/DR_{sim} > 1.01$ ,  $\tau_{est}$  is increased by a value of 0.01, and if  $DR_{mea}/DR_{sim} < 0.99$ ,  $\tau_{est}$  is decreased by a value of 0.01. The RTM is run again and the new  $DR_{sim}$  is compared to  $DR_{mea}$ . The process iterates until the condition,  $|DR_{mea}/DR_{sim} - 1| \leq 0.01$ , is met.

We run RD at three wavelengths to obtain  $\tau_{clid}$  at 500, 670, and 870 nm. Since cirrus clouds are made of ice crystals, we assume the layer  $AE \approx 0$ , and therefore the  $\tau_{clid}$  at the three wavelengths should be similar if only cloud is present. Significant spectral variation in  $\tau_{clid}$  – >5% deviation from the 500 nm retrieval to the 870 nm value – indicates that aerosols are present in the sampling layer. In such case, careful interpretation of the retrieval output is advised.

#### 3.5.2 Spectral Direct Beam Method, RS

425 The first step in implementing RS is to use Eq. 1 to derive the spectrally dependent total measured optical depth above  
the aircraft,  $\tau_{tot,\lambda}$ . The  $\mu$  term in Eq. 1 is calculated from the reported solar zenith angles logged in the P-3 flight records.  $F_0$   
in this calculation is determined using RTM simulations of  $F_{dir}$  at 14 km, which is an altitude above the cirrus cloud layer.  
This is done for all  $F_{dir}$  measurements contained within a square spiral where the 500 nm  $DR_{mea} < 0.95$ , which generally  
corresponds to  $\tau \sim 3$  (see Figure 2). This threshold on the diffuse ratio is used to ensure that there is measurable direct beam  
430 signal, and above this level, measurement uncertainty in  $F_{dir}$  makes it untenable to use RS. Using the atmospheric pressure  
measurements made from the P-3,  $\tau_{Ray,\lambda}$  is calculated by Eq. 9, and then these values are subtracted from  $\tau_{tot,\lambda}$ :

$$\tau_{\lambda} = \tau_{tot,\lambda} - \tau_{Ray,\lambda} \quad \text{Eq. 10}$$

We do this for a limited set of the SPN-S wavelengths,  $\lambda_{retrieval} = \{(460 - 540), (665 - 684), (746 - 755), (772 - 785), (860 - 879)\}$  nm. The wavelengths used in the retrieval were determined by studying simulated spectra of optical  
435 depths, such as those in Figure 1, and then selecting spectral regions where there is minimal influence of molecular absorption.  
The presence of some extinction by trace gases is acceptable at the selected wavelengths because we correct the  $\tau_{\lambda}$  spectra for  
these influences using aerosol free samples from the top of the spiral (see the following paragraphs for details of this step).  
This correction does not account for changes in column trace gas concentrations as the aerosol layer is profiled, which is a  
limitation of this method. Our analysis was bounded between 460 nm and 880 nm due to the SPN-S calibration issue described  
440 in Section 3.2.

The determination of  $F_0$ , the presence of trace gases, and calibration inconsistencies with the prototype SPN-S system  
led to complexities in implementing RS. Flight-to-flight changes in atmospheric conditions and the SPN-S calibration caused  
the derived  $\tau_{\lambda}$  profiles to have a spurious spectral shape, deviating from flat under clear-sky or cloud only conditions (the faint  
blue dots in Figure 4 are a good example of errors in  $\tau_{\lambda}$ ). These errors had a constant magnitude within a flight and were not  
445 proportional to signal magnitude. Issues related to the dark current correction may have been responsible for some of the  
observed behavior, though we are unsure. Additionally, the use of the RTM to derive  $F_0$ , which is traceable to the solar  
spectrum defined by Kurucz (1994), is a source of error in optical depth calculations. Nonetheless, we were able to account  
for these errors by using  $\tau_{\lambda}$  samples from high-altitude flight to adjust the measured optical depth profiles. To do this, spectral  
profiles of  $\tau_{\lambda}$  from aerosol free regions of the tops of the P-3 spirals were collected. The spiral tops are assumed to be aerosol  
450 free, and this assumption is checked by manually observing if the 4STAR aerosol optical depth ( $\tau_{4STAR}$ ) is  $< 0.05$ , or for  
CAMP<sup>2</sup>Ex case if the in situ integrated extinction ( $\tau_{insitu}$ ) has a significant gradient in this region of the spiral profile. Spirals  
with tops that are within the aerosol layer were excluded from the study. The spectral optical depth correction,  $\tau_{crr,\lambda}$ , is the  
mean optical depth that each channel is from a reference channel at 500 nm for the selected spiral top  $\tau_{\lambda}$  spectra:

$$\tau_{crr,\lambda} = \overline{\tau_{\lambda}} - \tau_{500nm} \quad \text{Eq. 11}$$

455 The optical depth correction is applied to all  $\tau_{\lambda}$  by subtraction:

$$\tau_{adj,\lambda} = \tau_{\lambda} - \tau_{crr,\lambda} \quad \text{Eq. 12}$$

Applying this correction is beneficial since Eq. 7 assumes  $\tau_\lambda$  has a smooth exponential shape, and correcting  $\tau_\lambda$  to a line allows for better representation of the data by the model. Due to this need to correct  $\tau_\lambda$ , we restrict use of RS to square spiral samples and do not use it for timeseries analysis of full science flights. In a sense, we are deriving layer optical depth with RS, and the spiral tops are used to characterize the flux at the top of the layer and deviations at lower altitude are accounted for by the  $\tau_{aer}$  term. RD in comparison, is temporally and spatially independent from itself and can be used at any point along the flight track when  $DR$  is sufficiently small – more details about the utility of both methods are discussed in Section 5. Further, scattering by low- and mid-altitude clouds can interfere with interpretation of  $F_{dir}$  and therefore spirals with significant amounts of these clouds were excluded from this study (e.g., if the P-3 entered cloud during the spiral, the spiral was not analyzed).

Each corrected optical depth profile,  $\tau_{adj,\lambda}$ , is compared to a series of curves generated using Eq. 7 for defined sets of  $\tau_{cld}$ ,  $\tau_{aer}$  and  $AE$ .  $\tau_{cld}$  is varied from 0 to 5 at 0.01 resolution,  $\tau_{aer}$  is varied from 0 to 1.5 with 0.01 resolution, and  $AE$  ranged from 1 to 2.0 with 0.1 resolution. The RMSE between each curve and the  $\tau_{adj,\lambda}$  sample is computed. The fit parameters-  $\tau_{cld}$ ,  $\tau_{aer}$ ,  $AE$  -corresponding to the curve with the lowest RMSE value are designated the outputs of the retrieval. Figure 4 shows two examples of RS for a clear-sky case (blue line) and a case within an aerosol layer (red line). The solid filled dots represent  $\tau_{adj,\lambda}$  and the impact of  $\tau_{crr,\lambda}$  is noticeable when comparing to the faded dots, which are the uncorrected optical depth profiles,  $\tau_\lambda$ . The solid lines represent Eq. 7 with the fit parameters set to the retrieval output in these two cases.

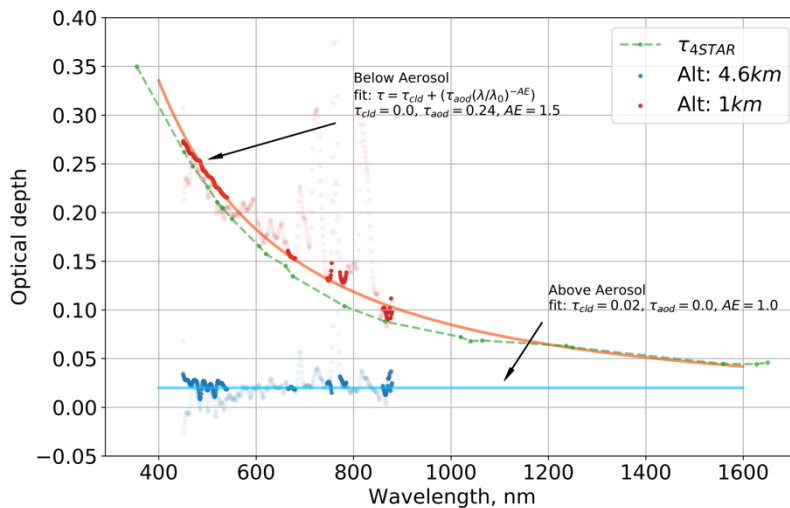

**Figure 4:** Two examples of the spectral optical depth used in RS to determine  $\tau_{cld}$  and  $\tau_{aer}$ . Both examples are from the spiral on 20181005 of the ORACLES mission. (1) A clear-sky case, colored in blue, from a sample taken at an altitude 4.6 km. (2) In red, a sample from 1 km which is ~~within~~ below the aerosol layer. The dark red/blue

dots are  $\tau_{adj,\lambda}$ , and they correspond to the red/blue dashed lines in Figure 1. The faded red/blue dots are  $\tau_\lambda = \tau_{tot,\lambda} - \tau_{Ray,\lambda}$  values from all SPN-S channels from 460 to 880 nm, including those not used in the retrieval. The blue and red lines represent the best-fit lines, for the RS outputs. The green line is  $\tau_{4STAR}$  as measured at 1 km altitude.

## 475 4 Results

We first present the results of the ORACLES campaign followed by the CAMP2Ex results. For each campaign we first show the retrieval performance for a one square-spiral case study, and then we give the aggregate statistics for the campaign.

### 480 4.1 ORACLES OCT 3, 2018 profile

Between 09:52:00 and 10:15:00 UTC, the P-3 flew a square spiral centered around a latitude and longitude of  $-6^\circ 35' 36.60''$ ,  $6^\circ 58' 12.36''$ , with a spiral midpoint SZA of  $22.8^\circ$ . The profile started at an altitude of 5.74 km and ended near the surface at 0.33 km. No clouds were present above the spiral start height, and this absence of cirrus was typical of the spirals conducted during the 2018 deployment of the ORACLES campaign. Despite this lack of cloud, we applied RD in addition to  
 485 RS to compare the outputs of the two methods. The left panel of Figure 5 shows both the measured 500 nm diffuse ratio,  $DR_{mea}^{500nm}$ , and 500 nm direct transmittance,  $T^{500nm}$  with their associated uncertainty. Starting just below the 4 km level, the magnitude of the slopes of both  $DR_{mea}^{500nm}$  and  $T^{500nm}$  steepen signaling the presence of an aerosol layer. The profiles remain predictable in shape all the way to the surface, with monotonic change, and no erratic points to indicate clouds along the profile path.

The right panel of Figure 5 shows the altitude profiles of 500 nm  $\tau_{aer}$  from RS ( $\tau_{RS,aer}$ , green), 4STAR ( $\tau_{4STAR}$ , red), in situ ( $\tau_{insitu}$ , cyan), and RD ( $\tau_{RD}$ , blue). Expectedly, the inability of RD to account for absorption within the aerosol layer leads to lower values of  $\tau_{aer}$  than the other methods below 3 km. ~~Above the aerosol layer, RD detects an optical depth of  $\sim 0.05$ , and this is similar to 4STAR, which commonly measures non-zero optical depths at the top of the spiral. These optical depths are mostly due to the presence of stratospheric aerosols (Kremser et al., 2016), though there may also be contribution from small amounts tropospheric aerosol as well.~~  
 495 Above the aerosol layer, RD detects a non-zero optical depth of  $\sim 0.05$ , which is mainly a result of the relatively high retrieval uncertainty of the RS method when observing small optical depths (see Figures 2 and 3). This is similar to the measurements made by 4STAR which commonly detects non-zero optical depths at the top of the spiral. However, in the case of 4STAR, these optical depths are mostly due to the presence of stratospheric aerosols (Kremser et al., 2016), though there may also be contribution from small amounts tropospheric aerosol as well. In the case of  
 500 4STAR, the  $\tau_{aer}$  measured at the top of the spiral is accounted for by subtracting off a constant value that is equal to the mean  $\tau_{4STAR}$  value above 5.5 km. Visual comparison between  $\tau_{RS,aer}$  and  $\tau_{4STAR}$  profiles show agreement with  $\tau_{4STAR}$  falling

within the reported uncertainty of  $\tau_{RS,aer}$  for all samples outside of a few  $\tau_{4STAR}$  outlier cases. With respect to  $\tau_{insitu}$  profile, both the  $\tau_{RS,aer}$  and  $\tau_{4STAR}$  agree well with the in situ measured extinction.

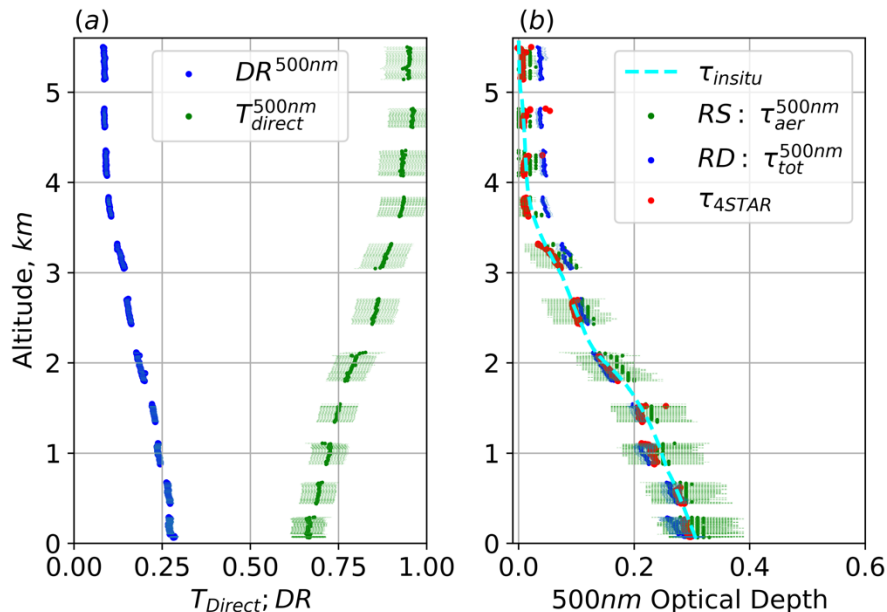

**Figure 5:** ORACLES spiral on 20181003. (a)  $DR_{mea}^{500nm}$  and  $T^{500nm}$  with the associated measurement uncertainty shown by the shading. (b)  $\tau_{aer}$  profiles derived from RS, 4STAR, in situ, and RD.

505

#### 4.2 2018 ORACLES mission statistics

There were 14 square spirals flown by the P-3 during the 2018 deployment of the ORACLES mission. The cumulated  $\tau_{aer}$  data from this set of spirals is used in regression analysis with 4STAR serving as the reference measurement. The left panel of Figure 6 shows scatter plots of  $\tau_{4STAR}$  vs  $\tau_{RS,aer}$  and  $\tau_{insitu}$ . Regression for  $\tau_{RS,aer}$  gives  $R^2 = 0.96$ , slope = 0.96, intercept =  $1.4 \times 10^{-3}$ , and RMSE is  $3.0 \times 10^{-2}$ . The high  $R^2$  value and low RMSE indicate that the SPN-S based aerosol optical depth retrieval ~~performs~~ performs well in comparison to 4STAR. Regression for  $\tau_{insitu}$  vs  $\tau_{4STAR}$  yields  $R^2 = 0.96$ , slope = 0.90, intercept =  $-2.1 \times 10^{-4}$  and RMSE is  $3.3 \times 10^{-2}$ . The good agreement between  $\tau_{4STAR}$  and  $\tau_{insitu}$  gives us confidence that integrating the in situ measurements of extinction can serve as a basis for comparison for the CAMP<sup>2</sup>Ex cases where 4STAR (or an equivalent system) was not operated. The right panel shows percent errors for  $\tau_{RS,aer}$  and  $\tau_{insitu}$  for binned  $\tau_{4STAR}$  values. At small optical depths, uncertainty is a significant fraction of the total optical depth signal, and this leads to large relative errors. As  $\tau_{4STAR}$  increases, the fractional error between  $\tau_{4STAR}$  and  $\tau_{RS,aer}$  decreases.

515



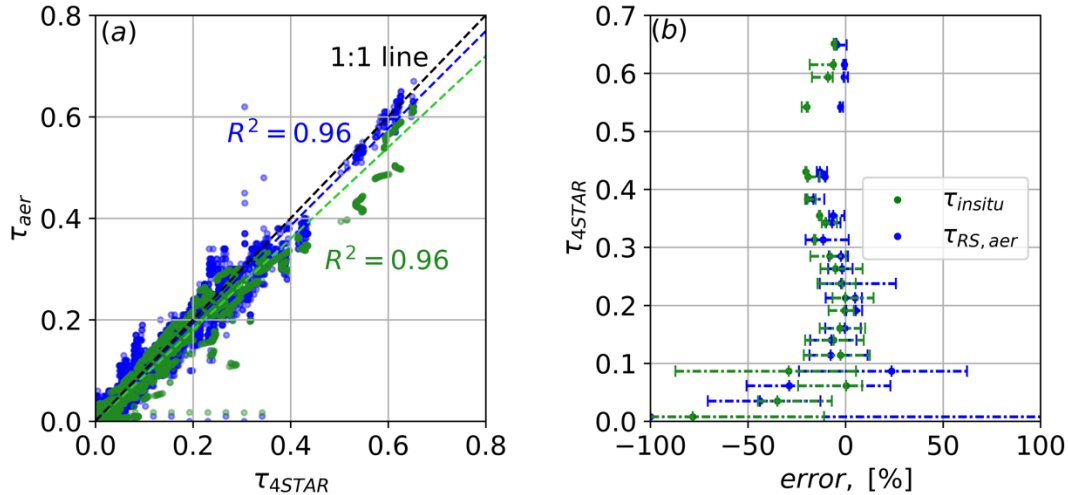

**Figure 6:** Aggregated  $\tau_{aer}$  statistics using  $\tau_{4STAR}$  as a baseline for the ORACLES campaign. (a) scatter plots of  $\tau_{4STAR}$  vs  $\tau_{RS,aer}$  and  $\tau_{insitu}$ . Regression on  $\tau_{RS,aer}$  gives  $R^2 = 0.96$ , slope = 0.96, intercept =  $1.4 \times 10^{-3}$ , and RMSE is  $3.0 \times 10^{-2}$ . Regression for  $\tau_{insitu}$  yields  $R^2 = 0.96$ , slope = 0.90, intercept =  $-2.1 \times 10^{-4}$  and RMSE is  $3.3 \times 10^{-2}$ . (b) Percent error in  $\tau_{RS,aer}$  and  $\tau_{insitu}$  relative to  $\tau_{4STAR}$ .  $\tau_{4STAR}$  values are sorted into bins with 0.025 optical depth width, and the corresponding statistics for  $\tau_{RS,aer}$  and  $\tau_{insitu}$  are reported. Dots represent the median value; tips of line are the 25 and 75 quantiles of the  $\tau_{RS,aer}$  and  $\tau_{insitu}$  distributions within each bin.

Figure 7 compares the total optical depths derived using RS and RD, where  $\tau_{RS,tot} = \tau_{RS,aer} + \tau_{RS,cld}$ . For these  
520 ORACLES cases conducted under cloud-free skies, the retrieval of  $\tau_{RD}$  is caused by aerosols. The regression slope (slope =  
0.84) deviates significantly from unity, which is expected because RD accounts for extinction only due to scattering. From our  
analysis in Section 2.3 we anticipate the regression to give a slope of less than one, with the value being linked to  $g$  and SSA  
of the aerosol layer (the green line in Figure 7 is the modeled relationship for  $g = 0.85$  and  $SSA = 1$ ). The aerosols sampled at  
ORACLES were absorbing, with mid-visible SSA values near 0.85 (Cochrane et al., 2020), and this sink of radiation by the  
525 aerosol layer, along with errors in the scattering phase function used in RD, are the main causes for  $\tau$  being underestimated by  
the RD method. A final point worth noting is that there are numerous instances when  $\tau_{RD}$  has a non-zero value yet  $\tau_{RS,tot}$  does  
not register an optical depth. This is not surprising given the higher sensitivity to small changes in  $\tau$  of the RD output.

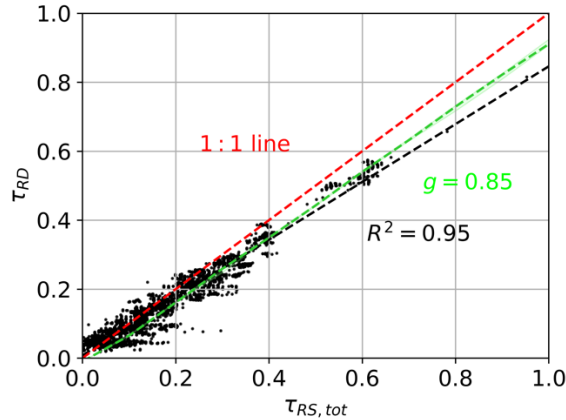

**Figure 7:** Aggregated optical depth data from ORACLES campaign  $\tau_{RS,tot}$  vs  $\tau_{RD}$ . Regression gives  $R^2 = 0.95$ , slope = 0.84, intercept =  $7.9 \times 10^{-3}$ . The green line is the predicted  $\tau_{RD}$  for a given  $\tau_{RS,tot}$  value, which is determined by RTM simulations (i.e., the red dashed line in the center panel of Figure 3), for  $g = 0.85$ .

#### 4.3 CAMP<sup>2</sup>Ex September 16, 2019 profile

530 From 00:57:00 to 01:27:00 UTC on 20190917 the P-3 flew a square spiral centered at latitude and longitude of  $13^{\circ}55'52.32''$ ,  $125^{\circ}27'41.76''$ , with a spiral midpoint SZA of  $36.1^{\circ}$ . The spiral profiled from an altitude of 5.59 km to the near the surface at 0.40 km. In contrast to the ORACLES case study, there were cirrus clouds present above the spiral location and their radiative signature can be seen in the deviation of both the  $DR_{mea}^{500nm}$  and  $T^{500nm}$  profiles from a monotonic curve above 3 km (left panel of Figure 8). Additionally, the dip in  $T^{500nm}$  value (seen as a spike in  $DR_{mea}^{500nm}$ ) around 2 km indicates the  
 535 influence of a cloud in the vicinity of the P-3. The variation in  $DR_{mea}^{500nm}$  and  $T^{500nm}$  due to clouds causes difficulty when visually attempting to discern the start of aerosol layer on the graph, but near 2.5 km the magnitudes of the  $T^{500nm}$  and  $DR_{mea}^{500nm}$  slopes increase indicating the presence of aerosols.

The middle panel of Figure 8 shows the altitude profiles of  $\tau_{RS,aer}$  and  $\tau_{insitu}$ . There is good agreement between the shape of the two curves, however  $\tau_{RS,aer}$  is consistently higher than  $\tau_{insitu}$  for altitudes below 2.5 km. We are not sure of the  
 540 specific reasons why  $\tau_{RS,aer}$  has higher values than  $\tau_{insitu}$  in this case. This bias was not found regularly in the other CAMP<sup>2</sup>Ex cases which indicates that instrument error, associated with either SPN-S or the in situ measurements, may be responsible for the observed differences in  $\tau_{aer}$ .

The right panel of Figure 8 shows cloud optical depth derived from the RS and RD methods,  $\tau_{RS,cloud}$  and  $\tau_{RD}$  respectively, as the P-3 profiled the atmosphere.  $\tau_{RD}$  is shown at 500, 670 and 870 nm. Above the aerosol layer (>2.5 km)  
 545 there is good consistency between the three wavelengths of  $\tau_{RD}$ . The 870 nm channel has slightly greater variance than the other two and this relates to increased noise levels and stray-light issues within the spectrometer that we observed for SPN-S channels past 850 nm. Above the aerosol layer  $\tau_{RD}$  has less variance in optical depth values than  $\tau_{RS,cloud}$ , though the majority

of samples of  $\tau_{RS,clld}$  and  $\tau_{RD}$  fall within their uncertainties. An imperfect attitude correction of the SPN-S appears to be the main driver of this discrepancy between the retrieved  $\tau_{RS,clld}$  and  $\tau_{RD}$  values. Since fluctuations in sensor attitude more severely impact the direct irradiance than the diffuse ratio, changes in the P-3 heading during the square spiral will influence  $\tau_{RS,clld}$  more than  $\tau_{RD}$ . One benefit of having two methods for retrieving  $\tau_{clld}$  is that sources of error that are a result of the experimental setup can be identified. We do not account for the uncertainty attributed to changes in sensor attitude on RS because there are engineering approaches, such as stabilizing platforms, and study methods that can be implemented which can reduce the impact aircraft attitude has on the measurement in future deployments of SPN-S.

Within the aerosol layer (<2.5 km), spectrally dependent absorption of the aerosol causes the three wavelengths of  $\tau_{RD}$  to diverge, with the longer wavelengths less influenced by the aerosols. While RD is limited when sampling in the aerosol layer because SSA is not known, the wavelength dependence of  $\tau_{RD}$  can be used to determine if aerosols are present. For  $\tau_{RS,clld}$ , the retrieved values from within the aerosol layer fall within the range of cloud optical depth observed above the aerosol layer.

560

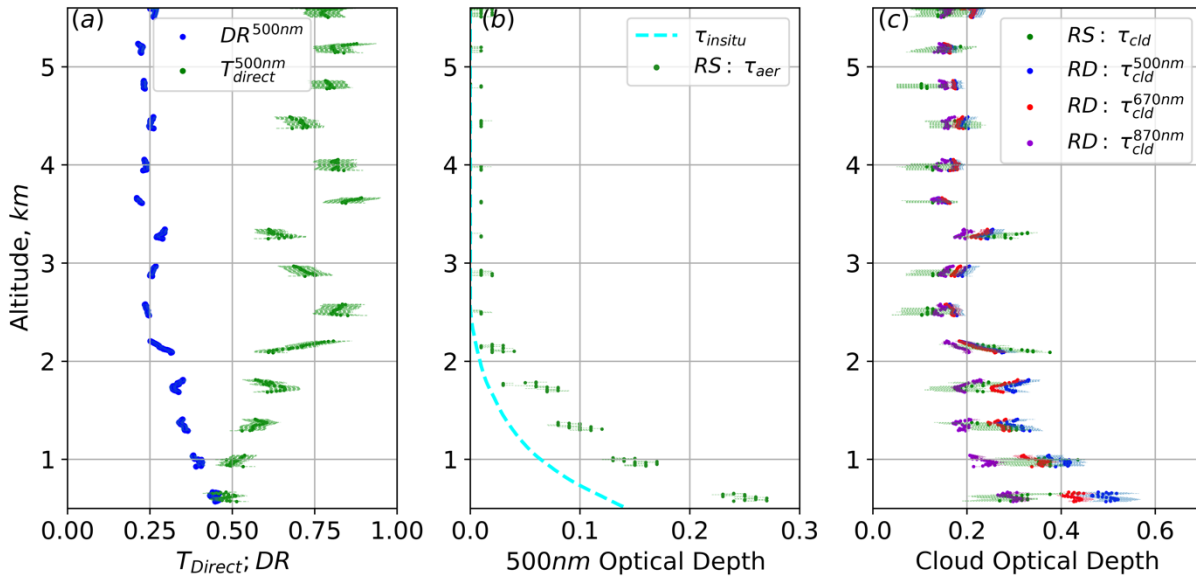

**Figure 8:** CAMP<sup>2</sup>Ex square spiral on 20190916. (a)  $DR_{mea}^{500nm}$  and  $T^{500nm}$  as a function of P-3 altitude with the associated measurement uncertainty shown by the shading. (b)  $\tau_{aer}$  profiles derived from RS and in situ. (c)  $\tau_{clld}$  values for RD at 500, 670, 870 nm and RS as a function of altitude.

#### 4.4 2019 CAMP2Ex mission statistics

There were 18 spirals flown by the P-3 during the CAMP<sup>2</sup>Ex campaign. Figure 9 shows the relationship of  $\tau_{RS,aer}$  vs  $\tau_{insitu}$  and the corresponding regression gives  $R^2 = 0.97$ , slope = 0.94, intercept =  $2.4 \times 10^{-4}$ , while RMSE is  $3.4 \times 10^{-2}$ . These aggregated results are consistent with the comparison between  $\tau_{4STAR}$  and  $\tau_{insitu}$  done for the ORACLES campaign, where  $\tau_{insitu}$  also had a slight low bias in relation to the 4STAR derived optical depths (slope = 0.90). The relatively clean air with lower aerosol extinction and more varied source regions sampled during the CAMP<sup>2</sup>Ex campaign (Hilario et al., 2021) restrict our ability to fully validate  $\tau_{RS,aer}$  under the cirrus conditions because the amount of sampling done at high  $\tau_{aer}$  was limited. Additional future work to further examine the retrieval of  $\tau_{aer}$  under a broader range of optical depths when cirrus clouds are present is needed. This is critical in light of the found limitations of the SDA method under cirrus conditions (Smirnov et al., 2018). However, we expect that since  $\tau_{RS,aer}$  is a layer, and not a column optical depth, the forward scattering of light by cirrus which inhibits the SDA method to be less troublesome for our RS method because the irradiance at the top of the layer is directly characterized. However, there is reason to expect the RS method will be able to retrieve  $\tau_{aer}$  under cirrus conditions to lower uncertainty than has been possible using past methods. For example, the SDA method is developed for use with ground-based measurements and therefore it derives a column optical depth. When retrieving column  $\tau_{aer}$  it is difficult to account for the forward scattering of light by cirrus which makes it difficult to accurately constrain  $\tau_{aer}$ . In the RS method, because the irradiance at the top of the layer is directly characterized, the forward scattering by cirrus is accounted for when deriving  $\tau_{aer}$ . Regardless, the limited retrieved  $\tau_{RS,aer}$  values at CAMP<sup>2</sup>Ex are consistent with relationship between of  $\tau_{insitu}$  and  $\tau_{4STAR}$  observed at ORACLES.

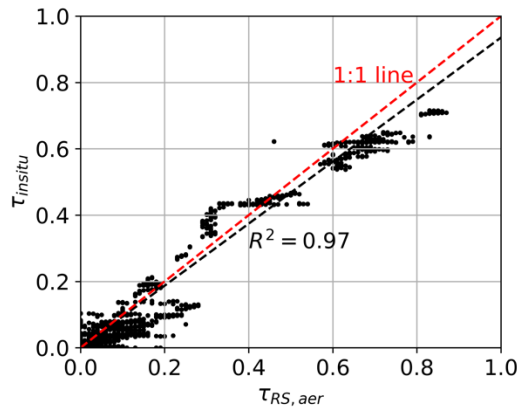

**Figure 9:**  $\tau_{RS,aer}$  vs  $\tau_{insitu}$  comparison from the CAMP<sup>2</sup>Ex campaign.

Like with the ORACLES results, we compare  $\tau_{RS,tot}$  to  $\tau_{RD}$  for two cases: (1) above the aerosol layer, which is shown in the left panel of Figure 10, and (2) the optical depths for complete spiral profiles (i.e., data from above and within the aerosol layer), which is shown in the right panel of Figure 10. At higher optical depths, the relationship between  $\tau_{RS,clid}$  and  $\tau_{RD}$  (left

585 panel) resembles the predicted one (see Section 2.3), with the sampled points clustering mostly along the 1:1 line. There is a grouping of points near  $\tau_{RS,clld} = 1$ , that have lower values of  $\tau_{RD}$ , which are depressing the regression slope from unity (slope = 0.94). A possible explanation for these points is clouds in the vicinity of the P-3 scattering light into the diffuse sensor of the SPN-S, biasing  $F_{dif}$  high, the result of which is low  $\tau_{RD,clld}$ . Comparing the relationship between the total set of samples ( $\tau_{RS,tot}$  vs  $\tau_{RS}$ , right panel), the points generally ~~falling fall~~ below the 1:1 line (slope = 0.89). Here, the addition of absorbing aerosols is the likely cause of the low  $\tau_{RD}$  values in relation to  $\tau_{RS,tot}$ . However, errors in the scattering phase function used in the RTM and the influence of mid-spiral clouds may also be partially responsible for the lower values of  $\tau_{RD}$  and the resulting low regression slope.

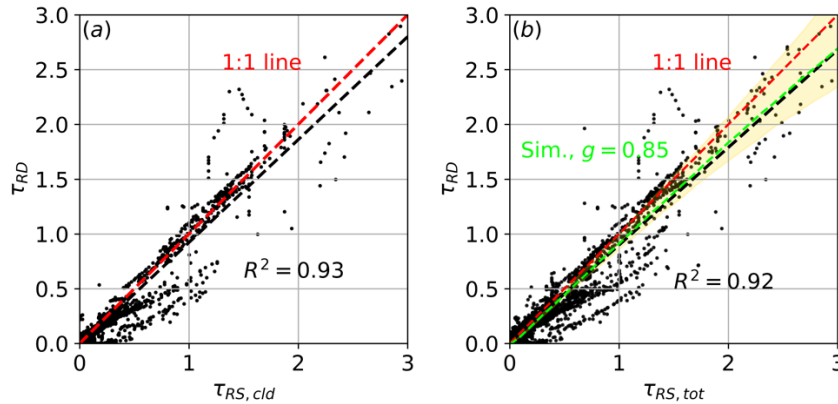

**Figure 10:** CAMP<sup>2</sup>Ex: (a) Above aerosol layer comparison:  $\tau_{RS,clld}$  vs  $\tau_{RD}$ . (b) All data total optical depth comparison:  $\tau_{RS,tot}$  vs  $\tau_{RD}$ . The dashed green line represents the expected  $\tau_{RD}$  given a value of  $\tau_{RS,tot}$  assuming  $g = 0.85$ .

#### 595 4.5 RD cirrus characterization along flight track

The inputs of RD are absolute, and therefore the method can be deployed to derive  $\tau_{clld}$  along P-3 flight tracks. We demonstrate this with an example from the science flight on ~~20190929~~ September 6<sup>th</sup>, 2019 from UTC 03:00 ~~to~~ -05:00. To reduce the computational time required to run the retrieval, with the 1 Hz SPN-S and SSFR irradiance data is subsampled at 0.1 Hz before being processed. For this sampling period SZA ranged from 10.0° to 17.6°. The top panel of Figure 11 shows the P-3 altitude and  $DR_{mea}^{500nm}$ , while  $\tau_{clld}$  at 500 and 670 nm are shown in the bottom panel, along with the ratio of the two optical depths. The presented data are not filtered for any criteria on  $DR$ . When  $DR$  is near unity the retrieval ~~performs~~ performs poorly, resulting in spikes in the retrieved value of  $\tau_{clld}$  – two examples of these events are seen at 03:30, and 04:30. When  $DR < 0.9$ , such as the start of the flight track from 03:00 ~~to~~ -03:28 or the section near the end, 04:45 ~~to~~ -04:56, there is consistency between  $\tau_{clld}^{500nm}$  and  $\tau_{clld}^{670nm}$ , indicating successful retrieval of  $\tau_{clld}$ . At lower altitudes, from 03:38- ~~to~~ 04:15, the

605 cloudier environment frequently causes the irradiance to become completely diffuse and the retrieval fails. During the low flight leg, 04:00 to -04:10, the ratio of  $\tau_{cld}^{500nm} / \tau_{cld}^{670nm}$  is high, indicating the possible presence of aerosols. A complete analysis of CAMP<sup>2</sup>Ex cirrus cloud optical and radiative properties is provided in Hong et al., (2021).

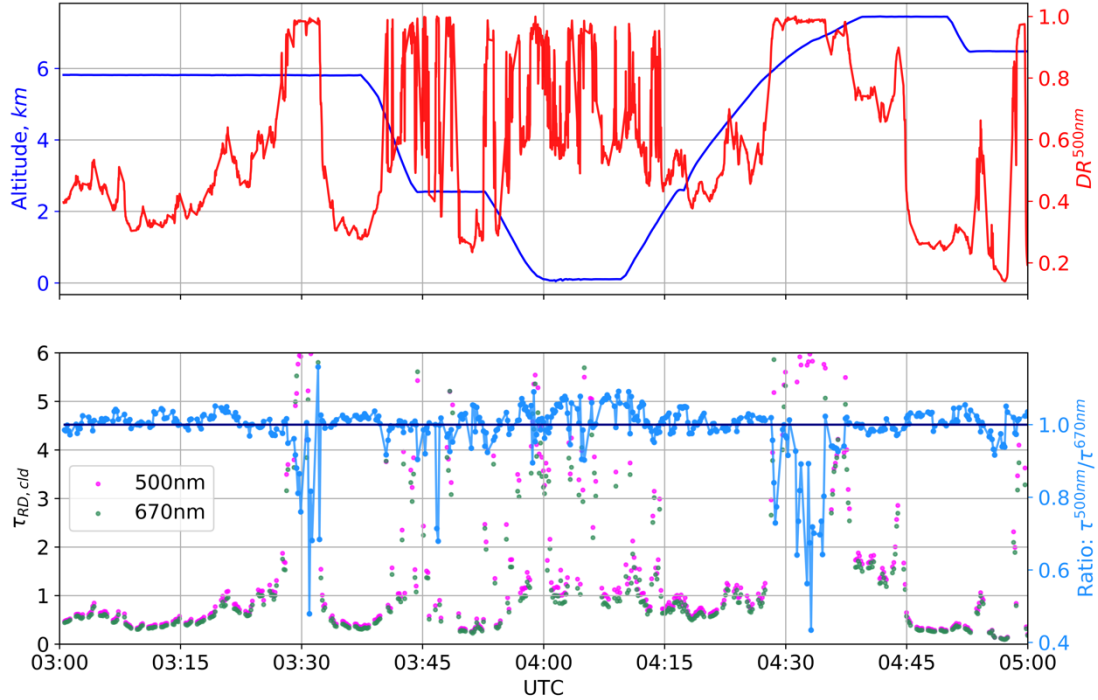

**Figure 11:** Time series of September 6<sup>th</sup>, 2019, partial flight-track of (a) P-3 Altitude and  $DR_{500nm}^{mea}$ , (b)  $\tau_{RD,cld}^{500nm}$  and  $\tau_{RD,cld}^{670nm}$ . The ratio,  $\tau_{RD,cld}^{500nm} / \tau_{RD,cld}^{670nm}$  is also shown.

## 610 5 Discussion

The application of the SPN-S radiometer to deriving overlying cloud and aerosol optical depth is promising, but there are tradeoffs that must be considered when comparing these methods to existing standards. If the objective is to identify and classify the optical properties of thin cloud (e.g.,  $\tau_{cld} < 1$ ), RD is a robust choice because the small uncertainty in  $DR$  allows for a highly sensitive retrieval. At optical depths greater than 1, the assumptions underpinning RD, especially knowledge of the scattering phase function, lose validity, causing significant errors in the retrieval output (see Figure 3). Since the relationship between the retrieved  $\tau_{cld}$  and its error can be largely explained for a given value of  $g$ , it may be possible to correct for the discrepancy between predicted and true cloud optical depth under conditions where  $g$  is constrained or there is accurate

620 knowledge of the phase function. However, the capabilities of RD will always be limited to thin clouds because beyond optical depth of about 5 the  $DR$  signal loses much of its sensitivity to changes in  $\tau_{clad}$ . Of course, this limit at which RD can accurately derive  $\tau_{clad}$  will be dictated by the performance of the sensor measuring  $DR$ . Another limitation of RD is that, without knowledge of the layer SSA, the effects of absorption on  $DR$  are not quantifiable, thus making the retrieval of limited use when aerosols are present. The caveat to this is the development of a simple aerosol flag, where spectral dependencies in RD output can be attributed to an absorber, such as aerosols, being present in the sampled layer.

625 The benefit of RS is that the retrieval has the potential to separate the cloud and aerosol radiative signals from each other. The tradeoff with the existing sun-photometry standards of measuring  $\tau_{aer}$  is greater uncertainty that stems from the difficulty in accurately measuring  $F_{dir}$  with a radiometer. Errors are induced into  $F_{dir}$  measurements by several mechanisms: changes in sensor attitude, calibration shifts over time, cosine response errors, temperature effects, etc. We attempt to reduce the uncertainty associated with these errors by sampling profiles of the atmosphere and using the high-altitude aerosol-free samples to correct for calibration errors and variations in atmospheric composition, but the need for this correction currently 630 limits the application of the method to profiles of atmospheric layers. While it is unlikely that the SPN-S system will ever be able to obtain the precision and accuracy of a system like 4STAR, there remains obvious room for improvement. Better characterization of the offset angles of the mounted SPN-S will reduce the error related to changing aircraft attitude. (During ORACLES and CAMP<sup>2</sup>Ex, SPN-S was not a priority instrument and flying the necessary flight patterns to determine the offset angles via the Long et al., (2010) method was not possible.) More sophisticated radiometric calibrations will also improve 635 retrieval performance, be it through laboratory comparisons with traceable lamp standards or using Langley techniques and intercomparison with known benchmarks. The 7-detector head design of SPN-S introduces technical challenges when calibrating using a lamp, and this being a prototype instrument, some of the challenges are still being worked through.

~~Another source of uncertainty related the SPN-S is the wider FOV shadow band radiometer systems have compared to sun photometers ( $\sim 5 - 10^\circ$  vs  $\sim 1^\circ$ ) which results in an overestimation of the direct transmittance (di Sarra et al, 2015; Wood et al, 2017).~~ Another source of uncertainty in optical depth retrievals relying on direct/diffuse measurements made from 640 SPN-S is the wide FOV associated with shadow band radiometer systems, which results in an overestimation of the direct transmittance. Biased measurements of transmittances due to the sensor FOV being wider than the solar disk are an issue associated with sun-photometers as well, however the FOV of the SPN-S system is greater than commonly used sun-photometers ( $\sim 5 - 10^\circ$  vs  $\sim 1^\circ$ ), making FOV correction necessary for accurate optical depth retrievals (di Sarra et al, 2015; Wood et al, 2017). Empirical methods can be used to account for the discrepancy in sensor FOV, but these methods are reliant 645 on large amounts of co-located measurements of  $\tau_{aer}$  with a sun-photometer under varying aerosol or cloud conditions. These empirical relationships are specific to the individual sensors themselves, meaning that we cannot apply previously generated FOV corrections here. In the specific cases used in this study, comparison with SPN-S and 4STAR did not indicate substantial FOV bias that warranted correcting  $\tau_{aer}$  so we did not apply those techniques. However, forward scattering in the direction of 650 the direct beam is most severe under thin ice clouds and so we used RTM simulations of the diffuse radiance to account for these effects when retrieving  $\tau_{clad}$  using both RS and RD (details contained in Appendix A).

RS is prone to errors when differentiating a signal between  $\tau_{cld}$  and  $\tau_{aer}$  if certain aerosol types are present. Coarse mode aerosols, such as dust particles, can have  $AE$  values near zero (Eck, et al., 1999), and therefore have minimal spectral dependence to their optical depth. That is, larger aerosol particles have extinction wavelength profiles similar to cirrus clouds. In cases where large aerosol particles are present, the  $\tau_{cld}$  term in Eq. 7 is also dependent on the coarse-mode aerosol optical depth. The aerosol type and clouds present when sampling will determine the extent to which large aerosols impact the retrieval output. For example, if the study region is cloud free, optical depths due to coarse-mode aerosols will still be able to be measured using RS by evaluating the  $\tau_{cld}$  term of the retrieval output. In fact, RS could be extended to do aerosol mode analysis under cloud-free skies in a manner similar to the SDA method used in sun-photometry (O'Neill et al., 2003).

Advances in the capability of SPN-S are ongoing and improvements to the system have already been made since the prototype version was deployed to ORACLES and CAMP<sup>2</sup>Ex. Most notably, software improvements now allow for sequential sampling to occur at multiple spectrometer integration times. The advantage of this technique is that both bright and dark parts of the irradiance spectrum can be resolved nearly simultaneously, giving much better instrument performance at the tails of its spectral range (<450 nm and >900 nm). Having greater spectral range in which to evaluate Eq. 7 will allow differentiating between cloud and aerosol optical depths to be done with greater confidence. Likewise, with the improved calibration mentioned earlier in this section it may be possible to eliminate the need for spiral-patterns and the associated optical depth correction. Instrument upgrades, along with measuring and accounting for extinction from trace gases (i.e., better representation of  $\tau_{mol,\lambda}$ ), opens the door for applying RS to a broader set of sampling types, such as along full flight tracks or to ground-based deployments. Making the mentioned improvements to SPN-S and using it in ground-based settings would produce useful data to use in the characterization of the retrieval uncertainty. All of these retrieval methods need more future work to better validate and understand their outputs, some of which is currently ongoing. Hong et al. (2021) will compare retrieved  $\tau_{cld}$  to similar results from space-borne remote sensors.

There are several more advantages of SPN-S system-based methods for cirrus cloud and aerosol studies to note. The SPN-S is a total-diffuse radiometer that has no moving parts which makes it an inexpensive and user-friendly instrument to operate in a wide variety of settings. Airborne sun-photometer or lidar systems tend to be mechanically and technologically complex resulting in significant overhead when operating them in field settings. Moreover, while the spectral analysis techniques of RS can be applied to any set of spectral direct irradiance measurements (for example, RS can be applied to spectral sun-photometer irradiances), a well characterized SPN-S system has inherent advantages. The SPN-S measurement of hyperspectral total irradiance provides a more complete view of the radiative environment rather than informing about only the optical depth and direct irradiance that sun-staring sun-photometry measurements provide. An example of how this might be beneficial is for the determination of heating rates in the atmosphere. With a measured spectral  $\tau_{aer}$  profile, radiometric based approaches have been advanced that allow aerosol intensive properties to be derived (Cochrane, 2020), from which it is possible to determine aerosol heating rates and radiative effects (Cochrane, 2021). SPN-S measurements may allow for similar studies to be completed with a consolidated set of instruments at lower cost. Additionally, aerosol intensive properties can be studied using the DR measurement in manners similar to Kassianov et al. (2007).



## 6 Conclusion

In this paper we used the capabilities of the newly developed SPN-S radiometer to implement two retrieval methods: RD is a scheme that utilizes single channel measurements of  $DR$  and  $a_{fl}$  to derive cirrus cloud optical depth, while RS is a technique that exploits structure in optical depth spectrum to partition it into  $\tau_{cld}$  and  $\tau_{aer}$  components. Since the primary radiometric input of RD is the ratio of two measured irradiances, calibration-induced uncertainties in the system are minimized, resulting in a retrieval that is highly sensitive to small optical depths. Unquantified absorption in the atmosphere limits the utility of RD to derive  $\tau_{cld}$ , with the caveat that the method can be used to identify the presence of aerosols by comparison of the retrieved optical depths at multiple wavelengths. On the other hand, RS is based on measurements of  $F_{dir}$  which have larger associated uncertainties stemming from calibration errors and the influence of changing sensor attitude. This makes RS best suited for deriving  $\tau_{cld}$  at values greater than unity where the inherent retrieval errors are a lower fraction of the output, or when aerosols are present. Since  $\tau_{aer}$  is derived from the spectral shape of the optical depth, and not the absolute value at any one wavelength, the  $\tau_{aer}$  output of the retrieval is less influenced by the measurement uncertainty than the spectrally-independent  $\tau_{cld}$  output.

We apply both methods to data from two field campaigns, ORACLES in 2018 and CAMP<sup>2</sup>Ex in 2019, to evaluate their performance. RS performed well at retrieving  $\tau_{aer}$  by comparison to measurements made by the 4STAR sun-photometer system (RMSE =  $3.0 \times 10^{-2}$ ) and optical depth as retrieved by in situ measurements both under clear-sky and cirrus conditions (RMSE =  $3.4 \times 10^{-2}$ ). There were limited cases of high aerosol loading under cirrus conditions so the retrieval performance under these circumstances warrant further investigation. The  $\tau_{cld}$  retrievals of both methods were evaluated against each other and behaved as our theoretical analysis predicted.

The optical depth retrieval uncertainties of these two new methods suggest that SPN-S is not a replacement for traditional sun-photometer instruments such as 4STAR. However, it is a low-cost alternative that is mechanically simple, making it logistically easier to deploy in many circumstances, such as on aircraft. Depending on the experiment, the tradeoffs in optical depth uncertainty of the SPN-S can be afforded by the accessibility it provides to reliably identifying the presence of above-aircraft clouds and aerosols. Cirrus identification is of value to other passive nadir-viewing sensors such as imaging and scanning radiometers and polarimeters. SPN-S is also advantageous in that it measures spectrally-resolved total, direct and diffuse irradiance which are useful quantities in the context of radiation science.

The SPN-S used in this study is a prototype, and work remains to better characterize the performance and calibration characteristics of the instrument. Much of this work is ongoing already, with software advancements having expanded the spectral range of the system, while improvements to the calibration procedures are a focus of current work. Increases in system predictability and reduced measurement uncertainty will allow for more versatility in the deployment of the methods presented in this study. For example, it may be possible to use RS for timeseries analysis if the calibration stability gets to the point where a profiling approach is no longer needed to correct for errors in the optical depth spectra. The combination of utility,

robustness and ease of implementation offered by the SPN-S make it feasible to implement in a wide variety of settings: from  
720 future airborne campaigns to long-term monitoring applications at ground-based field sites.

## Appendix A: FOV correction development

Forward scattering of radiation in the direction of the direct beam is a common phenomenon sun-photometry techniques must account for when deriving optical depth of aerosols and thin clouds (Segal-Rosenheimer et al., 2013).  
725 Frequently the full-angle FOV (here FOV refers to the full-, not half-angle, FOV of the sensor) of a sensor used to measure  $F_{dir}$  is greater than the angular width of the Sun's disk, causing diffuse light surrounding the direct beam to influence measurements. This overestimation of the direct transmittance leads to  $\tau$  being underestimated when implementing standard radiative transfer techniques. While the SPN-S does not function in the same manner as a sun-photometer to measure  $F_{dir}$ , the shadow mask used to block the direct beam when sampling  $F_{dif}$  has a shading area wider than the beam. That is, the shading  
730 area of the shadow mask is too large, and this leads to a low bias in measured  $F_{dif}$  and a high bias in derived  $F_{dir}$ . Under most atmospheric conditions this bias is minimal and can be ignored. However, it has been shown that when thin clouds are present, especially ice phase clouds which scatter strongly in the direction of the direct beam, the biases can lead to errors in  $\tau$  retrievals up to 100 percent (Segal-Rosenheimer et al., 2013).

To account for the contamination in measured  $F_{dir}$  by diffuse radiation, we developed corrections for the  $\tau_{cld}$  outputs  
735 of both methods presented in this paper, RS and RD, based on simulated radiance fields in the FOV of the SPN-S. These corrections are in the form of a relationship between the optical depth inferred by the sensor to the true optical depth, and they are dependent on solar zenith angle and wavelength.

To do this, we used the Mystic Monte Carlo Model that is a part of the libRadtran package (Emde et al., 2016) to simulate the diffuse radiance,  $L_{dif}$ , in the FOV of SPN-S. SPN-S is a prototype and its exact FOV is unknown, but it is  
740 estimated to be around  $8^\circ$  (Wood et al., 2017). Further, errors in FOV at angles past  $5^\circ$  will have minimal impact the optical depth correction because the majority of  $L_{dif}$  is found within the first angular degree or two from the center of the solar disk. We run a set of radiance simulations, with the sensor pointed towards the Sun's position, and calculate  $L_{dif}$  across the arc length of the FOV – scanning across the sensor FOV area in the azimuth and zenith directions. These simulations are done for a set of ice clouds with  $\tau_{cld}$  ranging from 0-6 at 0.1 resolution, over a black surface. We limited the Monte Carlo model runs  
745 to 1000 photons each, which is a low amount, but the FOV corrections are based on fits to sets of model runs and so the error of any one simulation due to the low photon count is minimal. Figure A1 shows an example of simulated diffuse transmitted radiance, defined as  $TL_{dif} = L_{dif}/F_0$ , as a function of viewing angle in the azimuth. Forward scattering from thin cirrus peaks around  $\tau_{cld} = 1$ , leading to the observable spike in  $TL_{dif}$ .

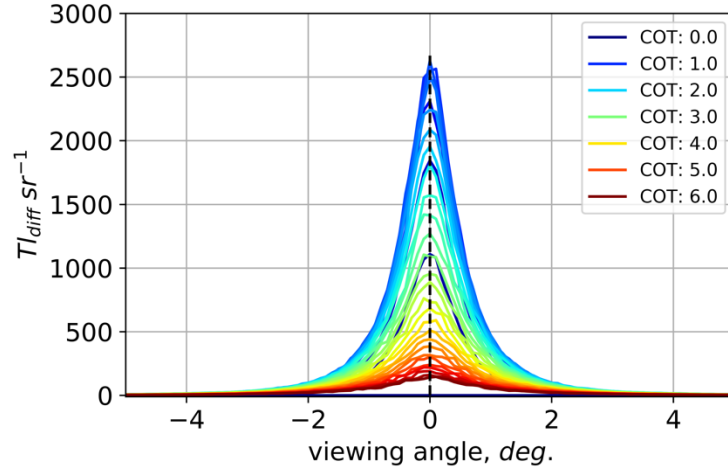

**Figure A1:** Simulations of diffuse radiance transmittance at 500 nm,  $Tl_{dif} = L_{dif}/F_0$  when scanning across the sensor FOV in the azimuthal direction. Line color corresponds to  $\tau_{cld}$  value. The Sun is positioned at a viewing angle of  $0^\circ$ , and the SZA is  $20^\circ$ .

750

We assume that the radiance field is symmetrical about both the zenith and azimuth axis and integrate the radiance fields to derive the total diffuse transmittance in the FOV of the sensor,  $T_{dif,FOV}$ :

$$T_{dif,FOV} = \iint_0^{fov} Tr_{dif} d\theta d\phi \quad \text{Eq. A1}$$

In practice, we split the integral along the four FOV paths we simulated using Mystic:

$$755 \quad T_{dif,FOV} = \frac{\pi}{2} \left[ \int_{0^\circ}^{4^\circ} Tl_{dif} d\phi + \int_{-4^\circ}^{0^\circ} Tl_{dif} d\phi + \int_{0^\circ}^{4^\circ} Tl_{dif} d\theta + \int_{-4^\circ}^{0^\circ} Tl_{dif} d\theta \right] \quad \text{Eq. A2}$$

$T_{dif,FOV}$  is the extra transmittance in the measurement of direct beam transmittance made by the sensor. Figure A2 shows the dependence  $T_{dif,FOV}$  has on  $\tau_{cld}$ .

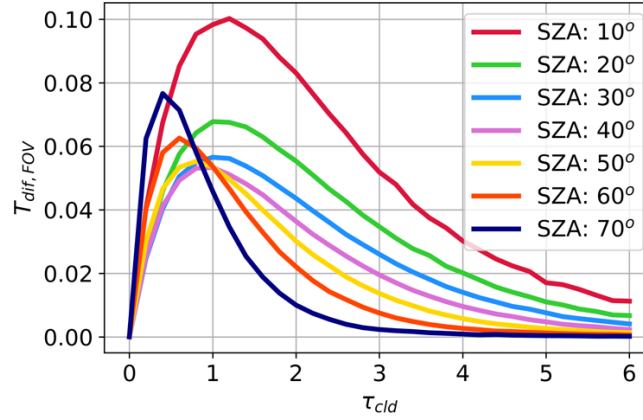

**Figure A2:**  $T_{dif,FOV}$  as a function of  $\tau_{cld}$  for the 500 nm wavelength. The relationship is shown for multiple SZA ranging from 10 – 70°.

For RS, the relationship between  $\tau_{cld}$  and the optical depth inferred from the method,  $\tau_i$ , is determined by inverting Beer's Law (Eq.1) and inserting the biased transmittance:

$$\tau_i = -\mu \ln(T_{dir,true} + T_{dif,FOV}) \quad \text{Eq. A3}$$

where  $T_{dir,true} = T_{dir,true}(\tau_{cld})$ , is the direct beam transmittance given a true cloud optical depth. Here again we use libRadtran to simulate  $T_{dir,true}$  for each  $\tau_{cld}$  value used in the simulations of  $T_{dif,FOV}$ . Likewise, for RD,  $T_{dif,FOV}$  is used to calculate the bias in DR and then Eq. 5 is used to find  $\tau_i$ :

$$\tau_i = \mu \ln \left( 1 - \frac{F_{dif,true} + F_{dif,FOV}}{F_{tot,true}} \right) \quad \text{Eq. A4}$$

where  $F_{dif,true}$  and  $F_{tot,true}$  are the true irradiances given a true cloud optical depth, and  $F_{dif,FOV}$  is the extra diffuse irradiance the sensor sees due to the wide FOV of the shadow mask ( $F_{dif,FOV} = F_0 \times T_{dif,FOV}$ ). Equations A3 and A4 form the relationships between  $\tau_i$  and  $\tau_{cld}$  which we then fit with fourth- or sixth-degree polynomials. The resulting curves give the correction factors for the retrieval outputs,  $\tau_{RS,cld}$  and  $\tau_{RD}$ . The retrieval outputs are the sensor inferred optical depths ( $\tau_i$ ), and we directly map these to the  $\tau_{cld}$  values; these relationships are illustrated in Figure A3.

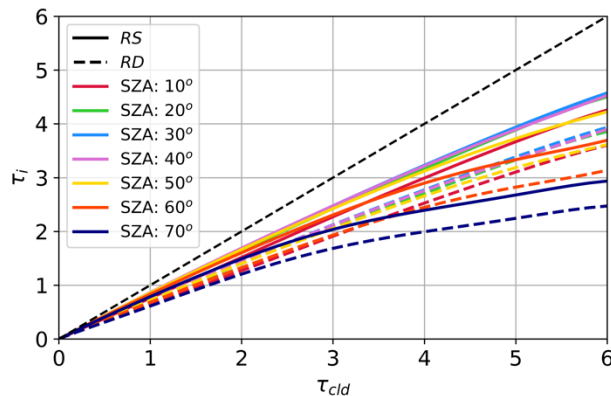

**Figure A3:**  $\tau_{cld}$  vs  $\tau_i$  relationships for RS and RD (Eqs. A3 and A4) for the 500 nm wavelength, with SZA ranging from 10 – 70°.

We derive these  $\tau_{cld}$  correction relationship for SZA ranging from 10 – 70° and at wavelengths of 500, 670, and 870 nm. When applying the corrections, the SZA dependence is accounted for by interpolating the derived factors to the SZA at the time of the sample. It is important to note that for the diffuse case, the correction is limited because we ignore the influence a non-zero surface albedo has on  $T_{dif,FOV}$ . Further, applying the correction to the output of RD when aerosols are present will cause errors, and so the correction is only applied in aerosol free regions. We also ignore the impact ice crystal habit has on this correction because for thin cirrus the overall correction is relatively small (~0-20%), and any error crystal habit induces will therefore have minimal impact on the final retrieved  $\tau_{cld}$  value.

*Data availability.* The data can be found in two NASA archives.

ORACLES: <https://espo.nasa.gov/ORACLES/archive/browse/oracles/id22/P3>.

Camp2ex: <https://www-air.larc.nasa.gov/cgi-bin/ArcView/camp2ex>.

*Author contributions.* MSN performed the analysis, collected SPN-S and SSFR data, and wrote the manuscript with input from the co-authors. JW developed the SPN-S, helped with interpretation of data, and edited the manuscript. KSS assisted with the development of the methodology, writing and editing of the manuscript. BvD and SAS aided in development of the RD method and edited the manuscript. LDZ, ECC, and MAS collected the CAMP<sup>2</sup>Ex in situ aerosol data, helped with data interpretation, and edited the manuscript. ASK helped with collection of SSFR and SPN-S data. SEL and SB provided 4STAR data and helped with data interpretation and editing. SF collected the ORACLES in situ aerosol. JSR is the PI of the CAMP<sup>2</sup>Ex mission and helped with editing the manuscript.

*Competing interests.* The authors declare that they have no conflict of interest.

795 **References**

- Anderson, G. P., Shepard, A. C., Kneizys, F. X., James, Chetwynd, H., and Eric, P. S.: AFGL atmospheric constituent profiles (0.120km), Report No. AFGL-TR-86-0110, Air Force Geophysics Lab Hanscom AFB MA, 1986.
- Ångström, A.: On the atmospheric transmission of sun radiation and on dust in the air, *Geogr. Ann.*, 11, 156-166, 1929.
- Badosa, J., Wood, J., Blanc, P., Long, C. N., Vuilleumier, L., Demengel, D., and Haeffelin, M.: Solar irradiances measured  
800 using SPN1 radiometers: uncertainties and clues for development, *Atmos. Meas. Tech.*, 7, 4267–4283,  
doi:10.5194/amt-7-4267-2014, 2014.
- Bennet, R.: NSRC Meteorological and Navigation (MetNav) User Guide, <https://www-air.larc.nasa.gov>, 2020.
- Bodhaine, B. A., Wood, N. B., Dutton, E. G., and Slusser, J. R.: On Rayleigh optical depth calculations, *J. Atmos. Ocean. Technol.*, 16, 1854–1861, 1999.
- 805 Bohren, C. F. and Huffman, D. R.: Absorption and scattering of light by small particles, Wiley, second edition edn., 1998.
- Bohren, C.F. and Clothiaux, E.E.: Fundamentals of Atmospheric Radiation. Wiley-VCH, Berlin.  
<https://doi.org/10.1002/9783527618620>, 2006.
- Chew, B. N., Campbell, J. R., Reid, J. S., Giles, D. M., Welton, E. J., Salinas, S. V., and Liew, S. C.: Tropical cirrus cloud  
contamination in sun photometer data, *Atmos. Environ.*, 45, 6724–6731,  
810 <https://doi.org/10.1016/j.atmosenv.2011.08.017>, 2011.
- Cochrane, S. P., Schmidt, K. S., Chen, H., Pilewskie, P., Kittelman, S., Redemann, J., LeBlanc, S., Pistone, K.,  
Kacenelenbogen, M., Segal Rozenhaimer, M., Shinozuka, Y., Flynn, C., Platnick, S., Meyer, K., Ferrare, R., Burton,  
S., Hostetler, C., Howell, S., Freitag, S., Dobracki, A., and Doherty, S.: Above-cloud aerosol radiative effects based  
on ORACLES 2016 and ORACLES 2017 aircraft experiments, *Atmos. Meas. Tech.*, 12, 6505– 6528,  
815 <https://doi.org/10.5194/amt-12-6505-2019>, 2020.
- Cochrane, S. P., Schmidt, K. S., Chen, H., Pilewskie, P., Kittleman, S., Redemann, J., LeBlanc, S., Pistone, K., Segal  
Rozenhaimer, M., Kacenelenbogen, M., Shinozuka, Y., Flynn, C., Ferrare, R., Burton, S., Hostetler, C., Mallet, M.,  
and Zuidema, P.: Biomass Burning Aerosol Heating Rates from the ORACLES 2016 and 2017 Experiments, *Atmos.*  
*Meas. Tech. Discuss.* [preprint], <https://doi.org/10.5194/amt-2021-169>, in review, 2021.
- 820 Dai, G., Wu, S., Song, X., Liu, L.: Optical and Geometrical Properties of Cirrus Clouds over the Tibetan Plateau Measured by  
LiDAR and Radiosonde Sounding during the Summertime in 2014. *Remote Sens.*, 11, 302.  
<https://doi.org/10.3390/rs11030302>, 2019.
- DeVore, J. G., Stair Jr., A. T., LePage, A. J. and Villanucci D.: Using scattering calculations to compare MODIS retrievals of  
thin cirrus optical properties with SAM solar disk and aureole radiance measurements, *J. Geophys. Res.*, 117, D01204,  
825 doi:10.1029/2011JD015858, 2012.

- Diskin, G.S.; Podolske, J.R.; Sachse, G.W.; and Slate, T.A.: "Open-Path Airborne Tunable Diode Laser Hygrometer," in *Diode Lasers and Applications in Atmospheric Sensing*, SPIE Proceedings 4817, A. Fried, editor, 196-204, 2002.
- Dunagan, S., Johnson, R., Zavaleta, J., Russell, P., Schmid, B., Flynn, C., Redemann, J., Shinozuka, Y., Livingston, J., and Segal Rozenhaimer, M.: Spectrometer for Sky-Scanning Sun-Tracking Atmospheric Research (4STAR): Instrument Technology, *Remote Sens.*, 5, 3872–3895, <https://doi.org/10.3390/rs5083872>, 2013.
- 830 Eck, T. F., Holben, B. N., Reid, J. S., Dubovic, O., Smirnov, A., O’Neil, N. T., Slutsker, I., and Kinne, S.: Wavelength dependence of the optical depth of biomass burning, urban, and desert dust aerosols, *J. Geophys. Res.*, 104(D24), 31 333–31 349, 1999.
- Emde, C., Buras-Schnell, R., Kylling, A., Mayer, B., Gasteiger, J., Hamann, U., Kylling, J., Richter, B., Pause, C., Dowling, T., and Bugliaro, L.: The libRadtran software package for radiative transfer calculations (version 2.0.1), *Geosci. Model Dev.*, 9, 1647–1672, <https://doi.org/10.5194/gmd-9-1647-2016>, 2016.
- 835 Fu, Q.: A New Parameterization of an Asymmetry Factor of Cirrus Clouds for Climate Models, *J. Atmos. Sci.*, 64, 4140–4150, 2007.
- Garrett, T. J. and Zhao, C.: Ground-based remote sensing of thin clouds in the Arctic, *Atmos. Meas. Tech.*, 6, 1227–1243, <https://doi.org/10.5194/amt-6-1227-2013>, 2013.
- 840 Giannakaki, E., Balis, D. S., Amiridis, V., and Kazadzis, S.: Optical and geometrical characteristics of cirrus clouds over a Southern European lidar station, *Atmos. Chem. Phys.*, 7, 5519–5530, <https://doi.org/10.5194/acp-7-5519-2007>, 2007.
- Herman, B., Browning, R., and De Luisi, J.: Determination of the effective imaginary term of the complex refractive index of atmospheric dust by remote sensing: The diffuse-direct radiation method, *J. Atmos. Sci.*, 32, 918–925, 1975.
- 845 Heymsfield, A. J., Schmitt, C., and Bansemer, A.: Ice cloud particle size distributions and pressure dependent terminal velocities from in situ observations at temperatures from 0° to -86°C, *J. Atmos. Sci.*, 70, 4123–4154, 2013.
- Heymsfield, A. J., Krämer, M., Luebke, A., Brown, P., Cziczo, D. J., Franklin, C., Lawson, P., Lohmann, U., McFarquhar, G., Ulanowski, Z., and Van Tricht, K.: Cirrus Clouds, *Meteorol. Monogr.*, 58, 2.1–2.26, <https://doi.org/10.1175/AMSMONOGRAPHS-D-16-0010.1>, 2017.
- 850 Hilario, M. R. A., Crosbie, E., Shook, M., Reid, J. S., Cambaliza, M. O. L., Simpas, J. B. B., Ziemba, L., DiGangi, J. P., Diskin, G. S., Nguyen, P., Turk, F. J., Winstead, E., Robinson, C. E., Wang, J., Zhang, J., Wang, Y., Yoon, S., Flynn, J., Alvarez, S. L., Behrangi, A., and Sorooshian, A.: Measurement report: Long-range transport patterns into the tropical northwest Pacific during the CAMP2Ex aircraft campaign: chemical composition, size distributions, and the impact of convection, *Atmos. Chem. Phys.*, 21, 3777–3802, <https://doi.org/10.5194/acp-21-3777-2021>, 2021.
- 855 Hong, Y., et al.: Cirrus cloud radiative properties as observed during the CAMP<sup>2</sup>Ex mission, *Atmos. Chem. Phys.*, *in preparation*, 2021.
- Holben, B. N., Eck, T. F., Slutsker, I., Tanré, D., Buis, J. P., Setzer, A., Vermote, E., Reagan, J. A., Kaufman, Y. J., Nakajima, T., Lavenu, F., Jankowiak, I., Smirnov, A.: AERONET—A Federated Instrument Network and Data Archive for

Aerosol Characterization, Remote Sensing of Environment, Volume 66, Issue 1, [https://doi.org/10.1016/S0034-4257\(98\)00031-5](https://doi.org/10.1016/S0034-4257(98)00031-5), 1998.

860

Kassianov, E. I., Flynn, C. J., Ackerman, T. P., and Barnard, J. C.: Aerosol single-scattering albedo and asymmetry parameter from MFRSR observations during the ARM Aerosol IOP 2003, *Atmos. Chem. Phys.*, 7, 3341–3351, <https://doi.org/10.5194/acp-7-3341-2007>, 2007.

865

Kinne, S., Ackerman, T. P., Shiobara, M., Uchiyama, A., Heymsfield, A. J., Miloshevich, L., Wendell, J., Eloranta, E., Purgold, C., and Bergstrom, R. W.: Cirrus cloud radiative and microphysical properties from ground observations and in situ measurements during FIRE 1991 and their application to exhibit problems in cirrus solar radiative transfer modeling, *J. Atmos. Sci.*, 54, 2320–2344, [https://doi.org/10.1175/1520-0469\(1997\)054<2320:CCRAMP>2.0.CO;2](https://doi.org/10.1175/1520-0469(1997)054<2320:CCRAMP>2.0.CO;2), 1997.

Kox, S., Bugliaro, L., and Ostler, A.: Retrieval of cirrus cloud optical thickness and top altitude from geostationary remote sensing, *Atmos. Meas. Tech.*, 7, 3233–3246, <https://doi.org/10.5194/amt-7-3233-2014>, 2014.

870

Kremser, S., Thomason, L. W., von Hobe, M., Hermann, M., Deshler, T., Timmreck, C., Toohey, M., Stenke, A., Schwarz, J. P., Weigel, R., Fueglistaler, S., Prata, F. J., Vernier, J.-P., Schlager, H., Barnes, J. E., Antuña-Marrero, J.-C., Fairlie, D., Palm, M., Mahieu, E., Notholt, J., Rex, M., Bingen, C., Vanhellemont, F., Bourassa, A., Plane, J. M. C., Klocke, D., Carn, S. A., Clarisse, L., Trickl, T., Neely, R., James, A. D., Rieger, L., Wilson, J. C., and Meland, B.: Stratospheric aerosol – Observations, processes, and impact on climate, *Rev. Geophys.*, 54, 278–335, <https://doi.org/10.1002/2015RG000511>, 2016

875

Kurucz, R. L.: Synthetic infrared spectra, in: *Infrared Solar Physics*, edited by; Rabin, D. M., Jefferies, J. T., and Lindsey, C., Springer-Science+Business Media, B. V., Tucson, Arizona, USA, 523–531, 1994.

LeBlanc, S. E., Redemann, J., Flynn, C., Pistone, K., Kacenelenbogen, M., Segal-rosenheimer, M., Shinozuka, Y., Dunagan, S., Dahlgren, R. P., Meyer, K., Podolske, J., Howell, S. G., Freitag, S., Small-griswold, J., Holben, B., Diamond, M., Wood, R., Formenti, P., Piketh, S., Maggs-Kölling, G., Gerber, M. and Namwoonde, A.: Above-cloud aerosol optical depth from airborne observations in the southeast Atlantic, *Atmos. Chem. Phys.*, 20, 1565–1590, doi:10.5194/acp-20-1565-2020, 2020.

880

Lee, J., Hsu, N. C., Bettenhausen, C., and Sayer, A. M.: Retrieval of aerosol optical depth under thin cirrus from MODIS: Application to an ocean algorithm, *J. Geophys. Res. Atmos.*, 118, 10,111–10,124, doi:10.1002/jgrd.50806, 2013.

885

Levy, R. C., Mattoo, S., Munchak, L. A., Remer, L. A., Sayer, A. M., and Hsu, N.: The Collection 6 MODIS aerosol products over land and ocean, *Atmos. Meas. Tech.* 6, 2989-3034, 2013.

Long, C. N., Bucholtz, A., Jonsson, H., Schmid, B., Vogelmann, A., and Wood, J.: A Method of Correcting for Tilt from Horizontal in Downwelling Shortwave Irradiance Measurements on Moving Platforms, *The Open Atmospheric Science Journal*, 4, 78–87, 2010.

890

McNaughton, C. S., Clarke, A. D., Howell, S. G., Pinkerton, M., Anderson, B. E., Thornhill, L., Hudgins, C., Winstead, E., Dibb, J. E., Scheuer, E., and Maring, H.: Results from the DC-8 Inlet Characterization Experiment (DICE): Airborne



- versus surface sampling of mineral dust and sea salt aerosols, *Aerosol Sci. Technol.*, 41(2), 136–159, doi:10.1080/02786820601118406, 2007.
- 895 Michalsky, J., Denn, F., Flynn, C., Hodges, G., Kiedron, P., Koontz, A., Schlemmer, J., and Schwartz, S. E.: Climatology of aerosol optical depth in north-central Oklahoma: 1992–2008, *J. Geophys. Res.*, 115, D07203, doi:10.1029/2009JD012197, 2010.
- O’Neill, N. T., Eck, T. F., Smirnov, A., Holben, B. N., and Thulasiraman, S.: Spectral discrimination of coarse and fine mode optical depth, *J. Geophys. Res.-Atmos.*, 108, 4559, <https://doi.org/10.1029/2002jd002975>, 2003.
- 900 Pierluissi, J. H. and Peng, G.: New molecular transmission band models for LOWTRAN, *Opt. Eng.*, 24, 541–547, <https://doi.org/10.1117/12.7973523>, 1985.
- Pilewskie, P., Pommier, J., Bergstrom, R., Gore, W., Howard, S., Rabbette, M., Schmid, B., Hobbs, P. V., and Tsay, S. C.: Solar spectral radiative forcing during the Southern African Regional Science Initiative, *J. Geophys. Res.*, 108, 8486, <https://doi.org/10.1029/2002JD002411>, 2003.
- 905 Redemann, J., Wood, R., Zuidema, P., Doherty, S. J., Luna, B., LeBlanc, S. E., Diamond, M. S., Shinozuka, Y., Chang, I. Y., Ueyama, R., Pfister, L., Ryoo, J.M., Dobracki, A. N., da Silva, A. M., Longo, K. M., Kacenenbogen, M. S., Flynn, C. J., Pistone, K., Knox, N. M., Piketh, S. J., Haywood, J. M., Formenti, P., Mallet, M., Stier, P., Ackerman, A. S., Bauer, S. E., Fridlind, A. M., Carmichael, G. R., Saide, P. E., Ferrada, G. A., Howell, S. G., Freitag, S., Cairns, B., Holben, B. N., Knobelspiesse, K. D., Tanelli, S., L’Ecuyer, T. S., Dzambo, A. M., Sy, O. O., McFarquhar, G. M., Poellot, M. R., Gupta, S., O’Brien, J. R., Nenes, A., Kacarab, M., Wong, J. P. S., Small-Griswold, J. D., Thornhill, K.
- 910 L., Noone, D., Podolske, J. R., Schmidt, K. S., Pilewskie, P., Chen, H., Cochrane, S. P., Sedlacek, A. J., Lang, T. J., Stith, E., Segal-Rozenhaimer, M., Ferrare, R. A., Burton, S. P., Hostetler, C. A., Diner, D. J., Seidel, F. C., Platnick, S. E., Myers, J. S., Meyer, K. G., Spangenberg, D. A., Maring, H., and Gao, L.: An overview of the ORACLES (ObseRvations of Aerosols above CLouds and their intEractionS) project: aerosol–cloud–radiation interactions in the southeast Atlantic basin, *Atmos. Chem. Phys.*, 21, 1507–1563, <https://doi.org/10.5194/acp-21-1507-2021>, 2021.
- 915 Remer, L. A., Mattoo, S., Levy, R. C., Heidinger, A., Pierce, R. B., and Chin, M.: Retrieving aerosol in a cloudy environment: aerosol product availability as a function of spatial resolution, *Atmos. Meas. Tech.*, 5, 1823–1840, <https://doi.org/10.5194/amt-5-1823-2012>, 2012.
- Reid, J., et al.: An overview of the Cloud, Aerosol and Monsoon Processes Philippines Experiment (CAMP<sup>2</sup>Ex) mission, *B. Am. Meteorol. Soc.*, *in preparation*, 2021.
- 920 di Sarra, A., Sferlazzo, D., Meloni, D., Anello, F., Bommarito, C., Corradini, S., De Silvestri, L., Di Iorio, T., Monteleone, F., Pace, G., Piacentino, S., and Pugnaghi, S.: Empirical correction of multifilter rotating shadowband radiometer (MFRSR) aerosol optical depths for the aerosol forward scattering and development of a long-term integrated MFRSR-Cimel dataset at Lampedusa, *Appl. Opt.*, 54, 2725–2737, doi:10.1364/ao.54.002725, 2015.

- 925 Sassen, K., Wang, Z., and Liu, D.: Global distribution of cirrus clouds from CloudSat/Cloud-Aerosol Lidar and Infrared  
Pathfinder Satellite Observations (CALIPSO) measurements, *J. Geophys. Res.*, 113, D00A12,  
doi:10.1029/2008JD009972, 2008.
- Segal-Rosenheimer, M., Russell, P. B., Livingston, J. M., Ramachandran, S., Redemann, J., and Baum, B. A.: Retrieval of  
cirrus properties by Sun photometry: A new perspective on an old issue, *J. Geophys. Res. Atmos.*, 118, 4503–4520,  
2013.
- 930 Smirnov, A., Zhuravleva, T. B., Segal-Rozenhaimer, M., and Holben, B. N.: Limitations of AERONET SDA product in  
presence of cirrus clouds, *J. Quant. Spectrosc. Ra.*, 206, 338–341, <https://doi.org/10.1016/j.jqsrt.2017.12.007>, 2018.
- Spencer, R. S., Levy, R. C., Remer, L. A., Mattoo, S., Arnold, G. T., Hlavka, D. L., Meyer, K. G., Marshak, A., Wilcox E.  
M., and Platnick, S. E.: Exploring aerosols near clouds with high-spatial-resolution aircraft remote sensing during  
SEAC4RS. *Journal of Geophysical Research: Atmospheres*, 124, 2148–2173.  
935 <https://doi.org/10.1029/2018JD028989>, 2019.
- Stamnes, K., Tsay, S.C., Wiscombe, W., and Jayaweera, K.: Numerically stable algorithm for discrete-ordinate-method  
radiative transfer in multiple scattering and emitting layered media, *Appl. Optics*, 27, 2502–2509, 1988.
- Stamnes, K., Tsay, S.C., Wiscombe, W., and Laszlo, I.: DISORT, a General-Purpose Fortran Program for Discrete-Ordinate-  
Method Radiative Transfer in Scattering and Emitting Layered Media: Documentation of Methodology, Tech. rep.,  
940 Dept. of Physics and Engineering Physics, Stevens Institute of Technology, Hoboken, NJ, USA, 2000.
- Torres, O., Bhartia, P. K., Herman, J. R., Sinyuk, A., Ginoux, P., and Holben, B.: A long-term record of aerosol optical depth  
from TOMS observations and comparison to AERONET measurements, *J. Atmos. Sci.*, 59, 398–413,  
[https://doi.org/10.1175/1520-0469\(2002\)059<0398:ALTROA>2.0.CO;2](https://doi.org/10.1175/1520-0469(2002)059<0398:ALTROA>2.0.CO;2), 2002.
- Zhou, Y., Sun, X., Mielonen, T., Li, H., Zhang, R., Li, Y., and Zhang, C.: Cirrus cloud optical thickness and effective diameter  
945 retrieved by MODIS: Impacts of single habit assumption, 3-D radiative effects, and cloud inhomogeneity. *Journal of  
Geophysical Research: Atmospheres*, 123, 1195–1210, 2018. <https://doi.org/10.1002/2017JD027232>
- Warren, S. G., Roesler, C. S., and Brandt, R. E.: Solar radiation processes in the east Antarctic sea-ice zone, *Ant. J. USA*, 32,  
185–186, 1997.
- Wood, J., Smyth, T. J., and Estellés, V.: Autonomous marine hyperspectral radiometers for determining solar irradiances and  
950 aerosol optical properties, *Atmos. Meas. Tech.*, 10, 1723–1737, <https://doi.org/10.5194/amt-10-1723-2017>, 2017.
- Yang, P., Bi, L., Baum, B. A., Liou, K.-N., Kattawar, G., and Mishchenko, M.: Spectrally consistent scattering, absorption,  
and polarization properties of atmospheric ice crystals at wavelengths from 0.2 $\mu\text{m}$  to 100 $\mu\text{m}$ , *J. Atmos. Sci.*, pp. 330–  
347, 2013.
- [Yang, Y., Zhao, C., Sun, L., and Wei, J.: Improved aerosol retrievals over complex regions using NPP Visible Infrared Imaging  
955 Radiometer Suite observations, \*Earth. Space. Sci.\*, 6, <https://doi.org/10.1029/2019ea000574>, 2019](https://doi.org/10.1029/2019ea000574)
- Ziamba, L. D., Hudgins, C. H., Obland, M. D., Rogers, R. R., Scarino, A. J., Winstead, E. L., Anderson, B. E., Thornhill, K.  
L., Ferrare, R., Barrick, J., Beyersdorf, A. J., Chen, G., Crumeyrolle, S., Hair, J., and Hostetler, C. A.: Airborne

observations of aerosol extinction by in-situ and remote-sensing techniques: Evaluation of particle hygroscopicity, *Geophys. Res. Lett.*, 40, 417–422, doi:10.1029/2012GL054428, 2013.

960 Zou, L., Griessbach, S., Hoffmann, L., Gong, B., and Wang, L.: Revisiting global satellite observations of stratospheric cirrus clouds, *Atmos. Chem. Phys.*, 20, 9939–9959, <https://doi.org/10.5194/acp-20-9939-2020>, 2020.
